# Supplementary material for: Regioselective α-addition of vinylogous α-ketoester enolate in organocatalytic asymmetric Michael reactions: enantioselective synthesis of Rauhut–Currier type products
Source: Royal Society of Chemistry journal article supplement (doi:10.1039/d2ra06416b), 2022-01-01

# Asymmetric Organocatalytic $\alpha$ -selective Vinylogous Michael Addition/isomerization for the Synthesis of Rauhut–Currier Type Products

Zhibing Weng,<sup>a,c</sup> Ying Zhou,<sup>b,c</sup> Xin Yue,<sup>b</sup> Feng Jiang,<sup>b</sup> and Wengang Guo<sup>\*b</sup>

<sup>a</sup> School of Chemical and Pharmaceutical Engineering, Changzhou Vocational Institute of Engineering, Changzhou, China.

<sup>b</sup> School of Petrochemical Engineering, Jiangsu Key Laboratory of Advanced Catalytic Materials & Technology, Changzhou University, Changzhou, China.

Email: wgguo@cczu.edu.cn

<sup>c</sup> These authors contributed equally to this work.

## Contents

|                                                                               |     |
|-------------------------------------------------------------------------------|-----|
| General Information-----                                                      | S2  |
| The Procedure for Synthesis of Vinylogous $\alpha$ -Keto Ester-----           | S3  |
| The Procedure for the Vinylogous Michael Addition/Isomerization Reaction----- | S3  |
| The Procedure for the Transformation of <b>3p</b> -----                       | S4  |
| Compound Characterization Data-----                                           | S6  |
| X-ray Crystal Structure of Compound <b>3b</b> -----                           | S12 |
| Copy of NMR Spectrum and HPLC Chromatograms-----                              | S14 |

## General Information

Unless otherwise noted, all reactions were carried out under argon atmosphere. TLC was performed with silica gel GF254 precoated on glass plates and spots were visualized with UV.  $^1\text{H}$  and  $^{13}\text{C}$  spectra were recorded on a 400 MHz spectrometer (101 MHz for  $^{13}\text{C}$  NMR). The following abbreviations were used to designate chemical shift, multiplicities: s = singlet, d = doublet, t = triplet, q = quartet, m = multiplet, br = broad. All first-order splitting patterns were assigned on the basis of the appearance of the multiplet. Splitting patterns that could not be easily interpreted are designated as multiplet (m) or broad (br). Column chromatography was performed on silica gel (300-400 mesh). HPLC analysis was performed on Agilent HPLC 1100 or 1200 equipped with Daicel Chiralpak<sup>®</sup> AD-H, AS-H, or OD-H column. High resolution mass spectra for all the new compounds were done by an LTQ-Orbitrap instrument (ESI) (Thermo Fisher Scientific, USA). Dry THF and Et<sub>2</sub>O were prepared based on the textbook "PURIFICATION OF LABORATORY CHEMICALS, FIFTH EDITION". Organocatalyst **A**, allylmagnesium bromide (1.0 M solution in diethyl ether J&K Seal), and vinylmagnesium bromide (1.0 M solution in THF J&K Seal) were purchased from J&K. Organocatalysts **C**, **D**, **E**, and **F** were purchased from Daicel Chiral Technologies (China) Co., LTD. Nitroalkenes **2a–2l**, and **2q** were purchased from Sigma-Aldrich or TCI.  $\beta$ -alkylnitroalkenes **2m–2p**. Dimethyl oxalate, diethyl oxalate, and Hoveyda-Grubbs II were purchased from the Energy Chemical. Other reagents and solvents were obtained from Tianjin Kemiou Chemical Reagent Co., Ltd. and directly used without further purification. The racemic products **3** were prepared under the catalysis of racemic organocatalyst **F**, which was obtained through the mixture of equal amount of (*R,R*)-**F** and (*S,S*)-**F** isomers.

## The Procedure for Synthesis of Vinylogous $\alpha$ -Keto Ester 1

A solution of diethyl oxalate (4.38 g, 30 mmol) in anhydrous THF/Et<sub>2</sub>O (1:1, 120 mL) under an argon atmosphere was cooled to -80 °C. Allylmagnesium bromide (30 mL of 1 M solution in diethyl ether) was added dropwise for 30 min, and the reaction was stirred for a further 30 min at the same temperature. A further small amount of allylmagnesium bromide (10 mL) was added, and the reaction was stirred for a further 10 min. The reaction was then warmed to -60 °C, and quenched by addition of 1 M H<sub>2</sub>SO<sub>4</sub> (50 mL). The product was extracted into diethyl ether (3 x 50 mL), and the combined extracts were washed with brine (2 x 50 mL), dried (MgSO<sub>4</sub>), and distilled under reduced pressure to give the desired product as yellow oil.

<sup>1</sup>H NMR (400 MHz, CDCl<sub>3</sub>)  $\delta$  5.93 (ddt, *J* = 17.1, 10.1, 6.8 Hz, 1H), 5.28 – 5.20 (m, 2H), 4.33 (q, *J* = 7.2 Hz, 2H), 3.61 (d, *J* = 6.8 Hz, 2H), 1.37 (t, *J* = 7.2 Hz, 3H); <sup>13</sup>C NMR (101 MHz, CDCl<sub>3</sub>)  $\delta$  191.97, 160.89, 128.35, 120.41, 62.64, 43.74, 14.06; HRMS (ESI) *m/z* calcd for C<sub>7</sub>H<sub>10</sub>O<sub>3</sub>, [M+H]<sup>+</sup> 143.0708, found 143.0705.

## The Procedure for the Preparation of Rauhut-Currier Type

### Products

To a flame over-dried test-tube were added nitroalkene **2** (0.4 mmol), squaramide organocatalyst **F** (1.0 mol %, 0.004 mmol), and toluene (2.0 mL). The reaction mixture was stirred at -10 °C for 15 min, then vinylogous  $\alpha$ -keto ester **1** (0.8 mmol, ~115  $\mu$ L) was added in one partition by using a pipettor. The reaction mixture was stirred at the same temperature until the full conversion of nitroalkene **2** (monitored by TLC analysis). After the completion of the reaction, the reaction was directly purified by column chromatography on silica gel (petroleum ether/ethyl acetate = 5/1 as the eluent) to afford the pure product for NMR and HPLC analysis.

## The Procedure for the Transformation of **3p**

(1) To a solution of **3p** (0.4 mmol, 120 mg, 95% ee) and 2-vinylnaphthalene (1.2 mmol, 186 mg) in DCM (30 mL) was added Zhan catalyst-1B (5.0 mol %, 0.02 mmol, 16 mg) at room temperature under the protection of argon. The resulting mixture was stirred at reflux temperature. After 2 h, the mixture was filtered through Celite, concentrated under reduced pressure, and purified by silica gel column chromatography (petroleum ether/ethyl acetate = 5/1 as the eluent).

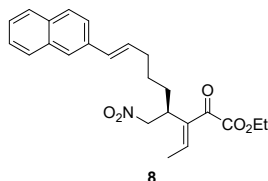

Waxy solid, 106 mg, 65% isolated yield based on **3p**.

<sup>1</sup>H NMR (400 MHz, CDCl<sub>3</sub>) δ 7.81 – 7.76 (m, 3H), 7.68 (s, 1H), 7.58 – 7.56 (m, 1H), 7.48 – 7.41 (m, 2H), 6.96 (q, *J* = 7.0 Hz, 1H), 6.54 (d, *J* = 15.8 Hz, 1H), 6.32 – 6.25 (m, 1H), 4.84 (dd, *J* = 12.6, 9.0 Hz, 1H), 4.61 (dd, *J* = 12.6, 5.8 Hz, 1H), 4.35 (q, *J* = 7.1 Hz, 2H), 3.63 – 3.55 (m, 1H), 2.27 (q, *J* = 7.0 Hz, 2H), 2.05 (d, *J* = 7.1 Hz, 3H), 1.91 – 1.84 (m, 1H), 1.73 – 1.65 (m, 1H), 1.55 – 1.41 (m, 2H), 1.37 (t, *J* = 7.1 Hz, 3H).

<sup>13</sup>C NMR (101 MHz, CDCl<sub>3</sub>) δ 189.07, 164.14, 152.17, 136.17, 135.08, 133.78, 132.85, 130.83, 130.23, 128.20, 127.94, 127.73, 126.28, 125.67, 125.60, 123.60, 77.60, 62.37, 36.86, 32.86, 29.57, 27.28, 15.53, 14.15.

HPLC analysis using Daicel CHIRALPAK OD-H column (*n*-Hexane/*i*PrOH = 85/15, 1.0 mL/min, λ = 254 nm, *t*<sub>major</sub> = 27.9 min, *t*<sub>minor</sub> = 35.0 min, 97% ee, [α]<sub>D</sub><sup>20</sup> = 16.5 (c = 0.8, in EtOAc))

HRMS (ESI) *m/z* calcd for C<sub>24</sub>H<sub>27</sub>NO<sub>5</sub>, [M+H]<sup>+</sup> 410.1967, found 410.1966.

(2) To a solution of **3p** (0.8 mmol, 120 mg) in DCM-H<sub>2</sub>O (1:1, 8.0 mL) were added ruthenium (III) chloride (40 mol %, 0.32 mmol, 66.4 mg) and NaIO<sub>4</sub> (1.5 eq, 1.20 mmol, 256 mg) at 25 °C. The solution was stirred for 3 h at the same temperature until the reaction was completed. The reaction was quenched by the addition of saturated aqueous Na<sub>2</sub>S<sub>2</sub>O<sub>3</sub> solution (10.0 mL). The solution was extracted with ethyl acetate, washed with brine, dried over Na<sub>2</sub>SO<sub>4</sub>, filtered through Celite, and concentrated in vacuo to give the desired crude product. The desired product was obtained by silica gel column chromatography (PE/EA = 5/1 to 2/1 as the eluent).

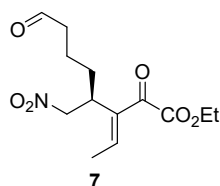

Light yellow oil, 94 mg, 41% isolated yield based on **3p**.

$^1\text{H}$  NMR (400 MHz,  $\text{CDCl}_3$ )  $\delta$  9.73 (s, 1H), 6.95 (q,  $J = 7.1$  Hz, 1H), 4.77 (dd,  $J = 12.7, 8.9$  Hz, 1H), 4.59 (dd,  $J = 12.7, 6.0$  Hz, 1H), 4.33 (q,  $J = 7.1$  Hz, 2H), 3.59 – 3.52 (m, 1H), 2.45 (t,  $J = 7.0$  Hz, 2H), 2.04 (d,  $J = 7.1$  Hz, 3H), 1.85 – 1.75 (m, 1H), 1.66 – 1.51 (m, 3H), 1.36 (t,  $J = 7.1$  Hz, 3H).

$^{13}\text{C}$  NMR (101 MHz,  $\text{CDCl}_3$ )  $\delta$  201.39, 189.02, 164.01, 152.56, 135.73, 77.39, 62.41, 43.46, 36.78, 29.38, 19.85, 15.54, 14.11.

HRMS (ESI)  $m/z$  calcd for  $\text{C}_{13}\text{H}_{19}\text{NO}_6$ ,  $[\text{M}+\text{Na}]^+$  308.1110, found 308.1111.

$[\alpha]_{\text{D}}^{20} = 24.86$  ( $c = 0.7$ , in EtOAc)

## Compound Characterization Data

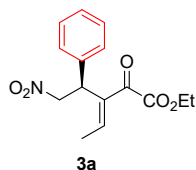

Light yellow liquid, 89.7 mg, 77% isolated yield based on **2a**.

$^1\text{H}$  NMR (400 MHz,  $\text{CDCl}_3$ )  $\delta$  7.34 – 7.21 (m, 5H), 6.99 (q,  $J = 7.0$  Hz, 1H), 5.23 – 5.10 (m, 2H), 4.87 (t,  $J = 7.6$  Hz, 1H), 4.32 (q,  $J = 7.1$  Hz, 2H), 2.12 (d,  $J = 7.0$  Hz, 3H), 1.34 (t,  $J = 7.1$  Hz, 3H).

$^{13}\text{C}$  NMR (101 MHz,  $\text{CDCl}_3$ )  $\delta$  188.77, 164.00, 151.90, 137.30, 136.91, 129.08, 127.77, 127.67, 76.78, 62.45, 41.24, 15.63, 14.12.

HPLC analysis using Daicel CHIRALPAK AD-H column (*n*-Hexane/*i*PrOH = 97/3, 0.5 mL/min,  $\lambda = 220$  nm,  $t_{\text{major}} = 35.2$  min,  $t_{\text{minor}} = 36.7$  min, 97% ee,  $[\alpha]_{\text{D}}^{20} = 16.7$  ( $c = 0.8$ , in EtOAc))

HRMS (ESI)  $m/z$  calcd for  $\text{C}_{15}\text{H}_{17}\text{NO}_5$ ,  $[\text{M}+\text{H}]^+$  292.1185, found 292.1181.

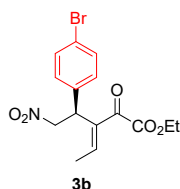

White solid, 118.5 mg, 80% isolated yield based on **2b**.

$^1\text{H}$  NMR (400 MHz,  $\text{CDCl}_3$ )  $\delta$  7.44 (d,  $J = 8.4$  Hz, 2H), 7.15 (d,  $J = 8.4$  Hz, 2H), 7.00 (q,  $J = 7.1$  Hz, 1H), 5.11 (d,  $J = 7.6$  Hz, 2H), 4.81 (t,  $J = 7.6$  Hz, 1H), 4.32 (q,  $J = 7.1$  Hz, 2H), 2.12 (d,  $J = 7.1$  Hz, 3H), 1.34 (t,  $J = 7.1$  Hz, 3H).

$^{13}\text{C}$  NMR (101 MHz,  $\text{CDCl}_3$ )  $\delta$  188.61, 163.79, 152.11, 136.54, 136.34, 132.18, 129.42, 121.81, 76.47, 62.56, 40.71, 15.69, 14.11.

HPLC analysis using Daicel CHIRALPAK AD-H column (*n*-Hexane/*i*PrOH = 97/3, 0.5 mL/min,  $\lambda = 220$  nm,  $t_{\text{major}} = 47.9$  min,  $t_{\text{minor}} = 45.7$  min, 97% ee,  $[\alpha]_{\text{D}}^{20} = 19.0$  ( $c = 1.1$ , in EtOAc))

HRMS (ESI)  $m/z$  calcd for  $\text{C}_{15}\text{H}_{16}\text{BrNO}_5$ ,  $[\text{M}+\text{H}]^+$  370.0290, found 370.0292.

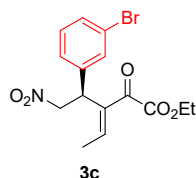

Light yellow oil, 114.0 mg, 77% isolated yield based on **2c**.

$^1\text{H}$  NMR (400 MHz,  $\text{CDCl}_3$ )  $\delta$  7.40 – 7.38 (m, 2H), 7.22 – 7.16 (m, 2H), 7.03 (q,  $J = 7.1$  Hz, 1H), 5.16 – 5.07 (m, 2H), 4.83 (t,  $J = 7.5$  Hz, 1H), 4.32 (q,  $J = 7.1$  Hz, 2H), 2.13 (d,  $J = 7.5$  Hz, 3H), 1.34 (t,  $J = 7.1$  Hz, 3H).

$^{13}\text{C}$  NMR (101 MHz,  $\text{CDCl}_3$ )  $\delta$  188.49, 163.76, 152.30, 139.51, 136.36, 131.00, 130.81, 130.60, 126.31, 123.04, 76.37, 62.57, 40.76, 15.74, 14.11.

HPLC analysis using Daicel CHIRALPAK AD-H column (*n*-Hexane/*i*PrOH =

97/3, 0.5 mL/min,  $\lambda = 220$  nm,  $t_{\text{major}} = 37.9$  min,  $t_{\text{minor}} = 34.4$  min, 98% ee,  $[\alpha]_{\text{D}}^{20} = 19.1$  (c = 1.3, in EtOAc))  
HRMS (ESI) m/z calcd for  $\text{C}_{15}\text{H}_{16}\text{BrNO}_5$ ,  $[\text{M}+\text{H}]^+$  370.0290, found 370.0289.

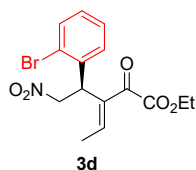

Light yellow oil, 103.7 mg, 70% isolated yield based on **2d**.

$^1\text{H}$  NMR (400 MHz,  $\text{CDCl}_3$ )  $\delta$  7.57 (d,  $J = 8.0$  Hz, 1H), 7.41 (d,  $J = 8.0$  Hz, 1H), 7.29 (t,  $J = 7.7$  Hz, 1H), 7.15 (t,  $J = 7.7$  Hz, 1H), 7.00 (q,  $J = 7.0$  Hz, 1H), 5.30 – 5.15 (m, H), 4.90 (dd,  $J = 13.0, 5.7$  Hz, 1H), 4.33 (q,  $J = 7.1$  Hz, 2H), 2.08 (d,  $J = 7.0$  Hz, 3H), 1.35 (t,  $J = 7.1$  Hz, 3H).

$^{13}\text{C}$  NMR (101 MHz,  $\text{CDCl}_3$ )  $\delta$  189.18, 163.86, 153.23, 135.89, 135.21, 133.48, 130.00, 129.55, 128.17, 124.33, 75.36, 62.50, 41.43, 16.26, 14.12.

HPLC analysis using Daicel CHIRALPAK AD-H column (*n*-Hexane/*i*PrOH = 97/3, 0.5 mL/min,  $\lambda = 220$  nm,  $t_{\text{major}} = 27.7$  min,  $t_{\text{minor}} = 28.5$  min, 97% ee,  $[\alpha]_{\text{D}}^{20} = 19.5$  (c = 1.0, in EtOAc))

HRMS (ESI) m/z calcd for  $\text{C}_{15}\text{H}_{16}\text{BrNO}_5$ ,  $[\text{M}+\text{H}]^+$  370.0290, found 370.0279.

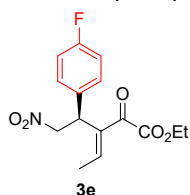

Light yellow oil, 85.4 mg, 69% isolated yield based on **2e**.

$^1\text{H}$  NMR (400 MHz,  $\text{CDCl}_3$ )  $\delta$  7.26 – 7.23 (m, 2H), 7.01 – 6.96 (m, 3H), 5.13 – 5.07 (m, 2H), 4.83 (t,  $J = 7.5$  Hz, 1H), 4.31 (q, 7.5 Hz, 2H), 2.11 (d,  $J = 7.1$  Hz, 3H), 1.33 (t,  $J = 7.5$  Hz, 3H).

$^{13}\text{C}$  NMR (101 MHz,  $\text{CDCl}_3$ )  $\delta$  188.76, 163.90, 162.14 ( $^1J_{\text{C-F}} = 247$  Hz), 151.90, 136.82, 133.11 ( $^4J_{\text{C-F}} = 3.1$  Hz), 129.42 ( $^3J_{\text{C-F}} = 8.2$  Hz), 115.94 ( $^2J_{\text{C-F}} = 21.6$  Hz), 76.77, 62.49, 40.61, 15.57, 14.07.

HPLC analysis using Daicel CHIRALPAK OD-H column (*n*-Hexane/*i*PrOH = 97/3, 0.8 mL/min,  $\lambda = 220$  nm,  $t_{\text{major}} = 49.8$  min,  $t_{\text{minor}} = 41.6$  min, 97% ee,  $[\alpha]_{\text{D}}^{20} = 18.9$  (c = 1.1, in EtOAc))

HRMS (ESI) m/z calcd for  $\text{C}_{15}\text{H}_{16}\text{FNO}_5$ ,  $[\text{M}+\text{H}]^+$  310.1091, found 310.1090.

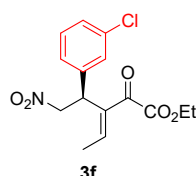

Light yellow oil, 106.8 mg, 82% isolated yield based on **2f**.

$^1\text{H}$  NMR (400 MHz,  $\text{CDCl}_3$ )  $\delta$  7.28 – 7.24 (m, 3H), 7.17 – 7.16 (m, 1H), 7.03 (q,  $J = 7.1$  Hz, 1H), 5.13 (d,  $J = 7.7$  Hz, 2H), 4.84 (t,  $J = 7.7$  Hz, 1H), 4.33 (q,  $J = 7.1$  Hz, 2H), 2.13 (d,  $J = 7.1$  Hz, 3H), 1.35 (t,  $J = 7.1$  Hz, 3H).

$^{13}\text{C}$  NMR (101 MHz,  $\text{CDCl}_3$ )  $\delta$  188.49, 163.76, 152.23, 139.24, 136.40, 134.87, 130.32, 128.07, 127.93, 125.83, 76.40, 62.56, 40.81, 15.72, 14.11.

HPLC analysis using Daicel CHIRALPAK AD-H column (*n*-Hexane/*i*PrOH = 97/3, 0.5 mL/min,  $\lambda$  = 220 nm,  $t_{\text{major}}$  = 36.3 min,  $t_{\text{minor}}$  = 32.6 min, 98% ee,  $[\alpha]_{\text{D}}^{20}$  = 11.9 (c = 0.8, in EtOAc))

HRMS (ESI)  $m/z$  calcd for  $\text{C}_{15}\text{H}_{16}\text{ClNO}_5$ ,  $[\text{M}+\text{H}]^+$  326.0795, found 326.0793.

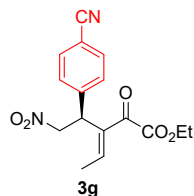

Light yellow oil, 88.6 mg, 70% isolated yield based on **2g**.

$^1\text{H}$  NMR (400 MHz,  $\text{CDCl}_3$ )  $\delta$  7.58 (d,  $J$  = 8.4 Hz, 2H), 7.37 (d,  $J$  = 8.4 Hz, 2H), 7.04 (q,  $J$  = 7.1 Hz, 1H), 5.20 – 5.03 (m, 2H), 4.90 (t,  $J$  = 7.5 Hz, 1H), 4.29 (q,  $J$  = 7.1 Hz, 2H), 2.12 (d,  $J$  = 7.1 Hz, 3H), 1.30 (t,  $J$  = 7.1 Hz, 3H).

$^{13}\text{C}$  NMR (101 MHz,  $\text{CDCl}_3$ )  $\delta$  188.41, 163.61, 152.82, 142.69, 136.04, 132.75, 128.48, 118.41, 111.68, 75.93, 62.64, 40.87, 15.78, 14.05.

HPLC analysis using Daicel CHIRALPAK OD-H column (*n*-Hexane/*i*PrOH = 85/15, 1.0 mL/min,  $\lambda$  = 220 nm,  $t_{\text{major}}$  = 46.1 min, >99% ee,  $[\alpha]_{\text{D}}^{20}$  = 11.7 (c = 0.7, in EtOAc))

HRMS (ESI)  $m/z$  calcd for  $\text{C}_{16}\text{H}_{16}\text{N}_2\text{O}_5$ ,  $[\text{M}+\text{H}]^+$  317.1137, found 317.1136.

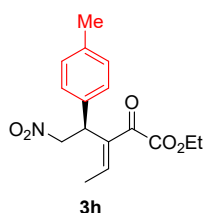

Light yellow oil, 98.0 mg, 80% isolated yield based on **2h**.

$^1\text{H}$  NMR (400 MHz,  $\text{CDCl}_3$ )  $\delta$  7.14 (q,  $J$  = 8.2 Hz, 4H), 6.97 (q,  $J$  = 7.1 Hz, 1H), 5.21 – 5.07 (m, 2H), 4.83 (t,  $J$  = 7.6 Hz, 1H), 4.32 (q,  $J$  = 7.1 Hz, 2H), 2.31 (s, 3H), 2.11 (d,  $J$  = 7.1 Hz, 3H), 1.35 (t,  $J$  = 7.1 Hz, 3H).

$^{13}\text{C}$  NMR (101 MHz,  $\text{CDCl}_3$ )  $\delta$  188.83, 164.04, 151.70, 137.51, 137.06, 134.27, 129.74, 127.55, 76.91, 62.41, 40.97, 21.09, 15.60, 14.12.

HPLC analysis using Daicel CHIRALPAK AD-H column (*n*-Hexane/*i*PrOH = 97/3, 0.5 mL/min,  $\lambda$  = 220 nm,  $t_{\text{major}}$  = 31.3 min,  $t_{\text{minor}}$  = 32.3, 97% ee,  $[\alpha]_{\text{D}}^{20}$  = 18.1 (c = 1.0, in EtOAc))

HRMS (ESI)  $m/z$  calcd for  $\text{C}_{16}\text{H}_{19}\text{NO}_5$ ,  $[\text{M}+\text{H}]^+$  306.1341, found 306.1329.

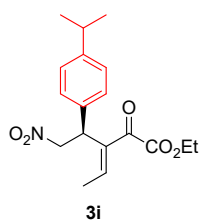

Light yellow oil, 92.0 mg, 69% isolated yield based on **2i**.



$^1\text{H}$  NMR (400 MHz,  $\text{CDCl}_3$ )  $\delta$  7.20 – 7.15 (m, 4H), 6.98 (q,  $J = 7.1$  Hz, 1H), 5.23 – 5.06 (m, 2H), 4.84 (dd,  $J = 8.4, 6.9$  Hz, 1H), 4.32 (q,  $J = 7.1$  Hz, 2H), 2.87 (hept,  $J = 6.9$  Hz, 1H), 2.11 (d,  $J = 7.1$  Hz, 3H), 1.34 (t,  $J = 7.1$  Hz, 3H), 1.22 (d,  $J = 6.9$  Hz, 6H).

$^{13}\text{C}$  NMR (101 MHz,  $\text{CDCl}_3$ )  $\delta$  188.85, 164.07, 151.73, 148.36, 137.02, 134.55, 127.61, 127.10, 76.92, 62.38, 40.98, 33.75, 23.94, 15.58, 14.10.

HPLC analysis using Daicel CHIRALPAK AD-H column (*n*-Hexane/*i*PrOH = 98/2, 0.4 mL/min,  $\lambda = 220$  nm,  $t_{\text{major}} = 37.1$  min,  $t_{\text{minor}} = 35.7$ , 98% ee,  $[\alpha]_{\text{D}}^{20} = 11.0$  (c = 0.5, in EtOAc))

HRMS (ESI)  $m/z$  calcd for  $\text{C}_{18}\text{H}_{23}\text{NO}_5$ ,  $[\text{M}+\text{H}]^+$  334.1654, found 334.1650.

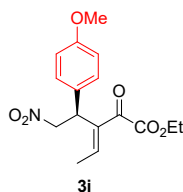

Light yellow oil, 90.0 mg, 70% isolated yield based on **2j**.

$^1\text{H}$  NMR (400 MHz,  $\text{CDCl}_3$ )  $\delta$  7.19 (d,  $J = 8.6$  Hz, 2H), 6.95 (q,  $J = 7.0$  Hz, 1H), 6.84 (d,  $J = 8.6$  Hz, 2H), 5.19 – 5.05 (m, 2H), 4.80 (t,  $J = 7.6$  Hz, 1H), 4.32 (q,  $J = 7.1$  Hz, 2H), 3.77 (s, 3H), 2.10 (d,  $J = 7.0$  Hz, 3H), 1.34 (t,  $J = 7.1$  Hz, 3H).

$^{13}\text{C}$  NMR (101 MHz,  $\text{CDCl}_3$ )  $\delta$  188.90, 164.04, 159.04, 151.55, 137.13, 129.26, 128.87, 114.40, 77.03, 62.42, 55.35, 40.71, 15.57, 14.12.

HPLC analysis using Daicel CHIRALPAK AD-H column (*n*-Hexane/*i*PrOH = 90/10, 0.8 mL/min,  $\lambda = 220$  nm,  $t_{\text{major}} = 20.2$  min, >99% ee,  $[\alpha]_{\text{D}}^{20} = 10.4$  (c = 0.6, in EtOAc))

HRMS (ESI)  $m/z$  calcd for  $\text{C}_{16}\text{H}_{19}\text{NO}_6$ ,  $[\text{M}+\text{H}]^+$  322.1291, found 322.1289.

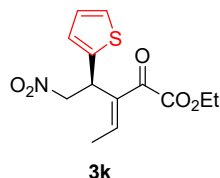

Light yellow oil, 103.5 mg, 87% isolated yield based on **2k**.

$^1\text{H}$  NMR (400 MHz,  $\text{CDCl}_3$ )  $\delta$  7.19 – 7.18 (m, 1H), 7.01 (q,  $J = 7.1$  Hz, 1H), 6.95 – 6.91 (m, 2H), 5.21 – 5.06 (m, 3H), 4.33 (q,  $J = 7.1$  Hz, 2H), 2.13 (d,  $J = 7.1$  Hz, 3H), 1.35 (t,  $J = 7.1$  Hz, 3H).

$^{13}\text{C}$  NMR (101 MHz,  $\text{CDCl}_3$ )  $\delta$  188.19, 163.74, 151.94, 139.38, 136.34, 127.17, 125.92, 125.20, 77.19, 62.51, 36.96, 15.49, 14.12.

HPLC analysis using Daicel CHIRALPAK AD-H column (*n*-Hexane/*i*PrOH = 97/3, 0.5 mL/min,  $\lambda = 220$  nm,  $t_{\text{major}} = 38.7$  min,  $t_{\text{minor}} = 37.5$  min, 98% ee,  $[\alpha]_{\text{D}}^{20} = 10.5$  (c = 0.6, in EtOAc))

HRMS (ESI)  $m/z$  calcd for  $\text{C}_{13}\text{H}_{15}\text{NO}_5\text{S}$ ,  $[\text{M}+\text{H}]^+$  298.0749, found 298.0745.

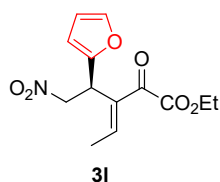

Light yellow oil, 86.6 mg, 77% isolated yield based on **2l**.

$^1\text{H}$  NMR (400 MHz,  $\text{CDCl}_3$ )  $\delta$  7.34 – 7.30 (m, 1H), 7.05 (q,  $J = 7.1$  Hz, 1H), 6.30 – 6.28 (m, 1H), 6.13 – 6.12 (m, 1H), 5.15 – 4.96 (m, 3H), 4.33 (q,  $J = 7.1$  Hz, 2H), 2.09 (d,  $J = 7.1$  Hz, 3H), 1.34 (t,  $J = 7.1$  Hz, 3H).

$^{13}\text{C}$  NMR (101 MHz,  $\text{CDCl}_3$ )  $\delta$  187.89, 163.84, 152.50, 149.96, 142.09, 134.40, 110.81, 107.15, 75.06, 62.49, 35.29, 15.51, 14.10.

HPLC analysis using Daicel CHIRALPAK AD-H column (*n*-Hexane/*i*PrOH = 97/3, 0.5 mL/min,  $\lambda = 220$  nm,  $t_{\text{major}} = 31.9$  min,  $t_{\text{minor}} = 28.9$  min, 94% ee,  $[\alpha]_{\text{D}}^{20} = 19.0$  (c = 1.2, in EtOAc))

HRMS (ESI)  $m/z$  calcd for  $\text{C}_{13}\text{H}_{15}\text{NO}_6$ ,  $[\text{M}+\text{H}]^+$  282.0978, found 282.0977.

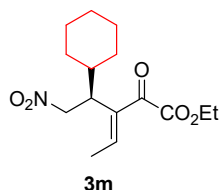

Light yellow oil, 100.0 mg, 84% isolated yield based on **2m**.

$^1\text{H}$  NMR (400 MHz,  $\text{CDCl}_3$ )  $\delta$  6.92 (q,  $J = 7.0$  Hz, 1H), 4.85 – 4.66 (m, 2H), 4.34 (q,  $J = 7.2$  Hz, 2H), 3.25 (td,  $J = 9.9, 4.9$  Hz, 1H), 1.99 (d,  $J = 7.0$  Hz, 3H), 1.86 – 1.75 (m, 3H), 1.69 – 1.56 (m, 3H), 1.36 (t,  $J = 7.2$  Hz, 3H), 1.30 – 0.95 (m, 4H), 0.84 – 0.75 (m, 1H).

$^{13}\text{C}$  NMR (101 MHz,  $\text{CDCl}_3$ )  $\delta$  189.24, 164.28, 152.60, 136.14, 76.45, 62.30, 42.91, 37.16, 31.61, 31.44, 26.12, 26.05, 25.94, 15.58, 14.14.

HPLC analysis using Daicel CHIRALPAK OD-H column (*n*-Hexane/*i*PrOH = 98/2, 0.4 mL/min,  $\lambda = 220$  nm,  $t_{\text{major}} = 25.4$  min,  $t_{\text{minor}} = 27.1$  min, >99% ee,  $[\alpha]_{\text{D}}^{20} = 15.8$  (c = 0.9, in EtOAc))

HRMS (ESI)  $m/z$  calcd for  $\text{C}_{15}\text{H}_{23}\text{NO}_5$ ,  $[\text{M}+\text{H}]^+$  298.1654, found 298.1651.

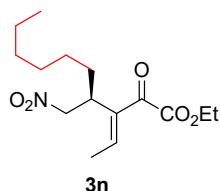

Light yellow oil, 72.1 mg, 60% isolated yield based on **2n**.

$^1\text{H}$  NMR (400 MHz,  $\text{CDCl}_3$ )  $\delta$  6.90 (q,  $J = 7.0$  Hz, 1H), 4.83 – 4.55 (m, 2H), 4.33 (q,  $J = 7.1$  Hz, 2H), 3.56 – 3.48 (m, 1H), 2.01 (d,  $J = 7.0$  Hz, 3H), 1.80 – 1.72 (m, 1H), 1.60 – 1.55 (m, 1H), 1.36 (t,  $J = 7.1$  Hz, 3H), 1.24 (br, 8H), 0.86 (t,  $J = 6.6$  Hz, 3H).

$^{13}\text{C}$  NMR (101 MHz,  $\text{CDCl}_3$ )  $\delta$  189.09, 164.17, 152.02, 136.28, 77.65, 62.31, 36.92, 31.63, 29.93, 29.03, 27.39, 22.60, 15.46, 14.12, 14.10.

HPLC analysis using Daicel CHIRALPAK AD-H column (*n*-Hexane/*i*PrOH = 97/3, 0.5 mL/min,  $\lambda = 220$  nm,  $t_{\text{major}} = 12.7$  min,  $t_{\text{minor}} = 13.3$  min, 98% ee,  $[\alpha]_{\text{D}}^{20} = 14.9$  (c = 0.7, in EtOAc))

HRMS (ESI)  $m/z$  calcd for  $\text{C}_{15}\text{H}_{26}\text{NO}_5$ ,  $[\text{M}+\text{H}]^+$  300.1811, found 300.1810.

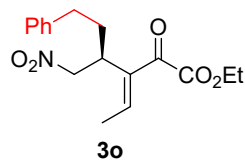

Light yellow oil, 112.4 mg, 88% isolated yield based on **2o**.

$^1\text{H}$  NMR (400 MHz,  $\text{CDCl}_3$ )  $\delta$  7.30 – 7.27 (m, 2H), 7.22 – 7.18 (m, 1H), 7.15 – 7.13 (m, 2H), 6.93 (q,  $J = 7.1$  Hz, 1H), 4.85 – 4.57 (m, 2H), 4.36 (q,  $J = 7.1$  Hz, 2H), 3.58 – 3.50 (m, 1H), 2.68 – 2.61 (m, 1H), 2.55 – 2.47 (m, 1H), 2.19 – 2.09 (m, 1H), 2.03 – 1.94 (m, 1H), 1.83 (d,  $J = 7.1$  Hz, 3H), 1.38 (t,  $J = 7.1$  Hz, 3H).

$^{13}\text{C}$  NMR (101 MHz,  $\text{CDCl}_3$ )  $\delta$  189.17, 164.16, 152.68, 140.41, 135.78, 128.66, 128.44, 126.39, 77.51, 62.41, 36.05, 33.23, 30.94, 15.35, 14.17.

HPLC analysis using Daicel CHIRALPAK AD-H column (*n*-Hexane/*i*PrOH = 97/3, 0.5 mL/min,  $\lambda = 220$  nm,  $t_{\text{major}} = 24.8$  min,  $t_{\text{minor}} = 23.4$  min, 96% ee,  $[\alpha]_{\text{D}}^{20} = 17.1$  (c = 0.8, in EtOAc))

HRMS (ESI)  $m/z$  calcd for  $\text{C}_{17}\text{H}_{21}\text{NO}_5$ ,  $[\text{M}+\text{H}]^+$  320.1498, found 320.1490.

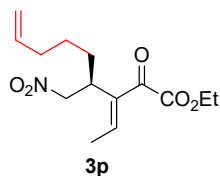

Light yellow oil, 71.4 mg, 63% isolated yield based on **2p**.

$^1\text{H}$  NMR (400 MHz,  $\text{CDCl}_3$ )  $\delta$  6.91 (q,  $J = 7.1$  Hz, 1H), 5.72 (ddt,  $J = 16.9, 10.2, 6.7$  Hz, 1H), 4.99 – 4.93 (m, 2H), 4.82 – 4.76 (m, 1H), 4.59 – 4.55 (m, 1H), 4.32 (q,  $J = 7.1$  Hz, 2H), 3.56 – 3.49 (m, 1H), 2.05 – 2.00 (m, 5H), 1.82 – 1.72 (m, 1H), 1.62 – 1.55 (m, 1H), 1.39 – 1.24 (m, 5H).

$^{13}\text{C}$  NMR (101 MHz,  $\text{CDCl}_3$ )  $\delta$  189.05, 164.12, 152.12, 137.91, 136.14, 115.24, 77.56, 62.32, 36.77, 33.37, 29.34, 26.65, 15.46, 14.11.

HPLC analysis using Daicel CHIRALPAK OD-H column (*n*-Hexane/*i*PrOH = 99/1, 0.4 mL/min,  $\lambda = 220$  nm,  $t_{\text{major}} = 39.2$  min,  $t_{\text{minor}} = 42.1$  min, 95% ee,  $[\alpha]_{\text{D}}^{20} = 16.1$  (c = 1.0, in EtOAc))

HRMS (ESI)  $m/z$  calcd for  $\text{C}_{14}\text{H}_{21}\text{NO}_5$ ,  $[\text{M}+\text{Na}]^+$  306.1317, found 306.1319.

## X-ray Crystal Structure of Compound 3b

### Crystal data for compound 3b

---

|                                                                                       |                                                     |
|---------------------------------------------------------------------------------------|-----------------------------------------------------|
| Molecular formula                                                                     | C <sub>15</sub> H <sub>16</sub> Br N O <sub>5</sub> |
| <i>F</i> <sub>w</sub>                                                                 | 370.2                                               |
| Crystal shape/color                                                                   | Block/Colorless                                     |
| Crystal size, mm                                                                      | 0.42 × 0.39 × 0.36                                  |
| Crystal system                                                                        | Triclinic                                           |
| Space group                                                                           | P-1                                                 |
| <i>a</i> (Å)                                                                          | 8.5887(8)                                           |
| <i>b</i> (Å)                                                                          | 10.3821(10)                                         |
| <i>c</i> (Å)                                                                          | 10.6032(8)                                          |
| <i>α</i> (°)                                                                          | 96.304(7)                                           |
| <i>β</i> (°)                                                                          | 112.149(8)                                          |
| <i>γ</i> (°)                                                                          | 105.649(8)                                          |
| <i>V</i> , Å <sup>3</sup>                                                             | 819.19(13)                                          |
| <i>Z</i>                                                                              | 2                                                   |
| <i>T</i> , K                                                                          | 298(2)                                              |
| <i>m</i> (MoKα), mm <sup>-1</sup>                                                     | 0.7107                                              |
| <i>ρ</i> <sub>calcd</sub> , g cm <sup>-3</sup>                                        | 1.501                                               |
| Reflections/parameters                                                                | 3617/201                                            |
| Restraints                                                                            | 0                                                   |
| Observed reflections ( <i>I</i> ≥ 2 <i>s</i> ( <i>I</i> ))                            | 2247                                                |
| <i>F</i> (000)                                                                        | 376                                                 |
| <i>T</i> <sub>min</sub>                                                               | 0.57498                                             |
| <i>T</i> <sub>max</sub>                                                               | 1.00000                                             |
| Goodness of fit on <i>F</i> <sup>2</sup>                                              | 1.063                                               |
| <i>R</i> <sub>1</sub> , <i>ωR</i> <sub>2</sub> ( <i>I</i> ≥ 2 <i>σ</i> ( <i>I</i> ))* | 0.0529, 0.1111                                      |
| <i>R</i> <sub>1</sub> , <i>ωR</i> <sub>2</sub> (all data)*                            | 0.09994, 0.1354                                     |
| Largest peak and deepest hole (e Å <sup>-3</sup> )                                    | 0.605, -0.747                                       |

---

### Selected bond lengths (Å) and angles for 3b

---

|         |          |
|---------|----------|
| Br1-C1  | 1.893(4) |
| C1-C6   | 1.350(5) |
| C1-C2   | 1.361(6) |
| C2-C3   | 1.373(6) |
| C3-C4   | 1.371(5) |
| C4-C5   | 1.363(5) |
| C4-C7   | 1.528(5) |
| C5-C6   | 1.386(6) |
| C7-C9   | 1.523(4) |
| C7-C8   | 1.527(5) |
| C8-N1   | 1.490(5) |
| C9-C10  | 1.337(4) |
| C9-C12  | 1.461(5) |
| C10-C11 | 1.488(5) |
| C12-O3  | 1.212(4) |
| C12-C13 | 1.524(4) |
| C13-O4  | 1.196(4) |
| C13-O5  | 1.311(4) |
| C14-C15 | 1.454(7) |
| C14-O5  | 1.463(4) |
| N1-O2   | 1.204(5) |
| N1-O1   | 1.206(4) |

---

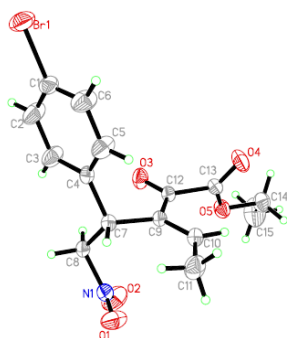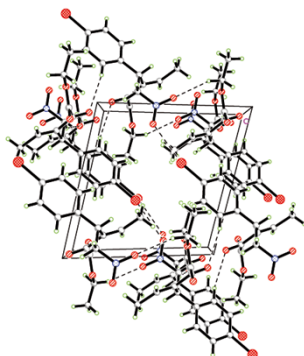

CCDC **1536616** contains the supplementary crystallographic data for this paper. These data can be obtained free of charge from Cambridge Crystallographic Data Centre via [www.ccdc.cam.ac.uk/data\\_request/cif](http://www.ccdc.cam.ac.uk/data_request/cif)

## Copy of NMR Spectrum and HPLC Chromatograms

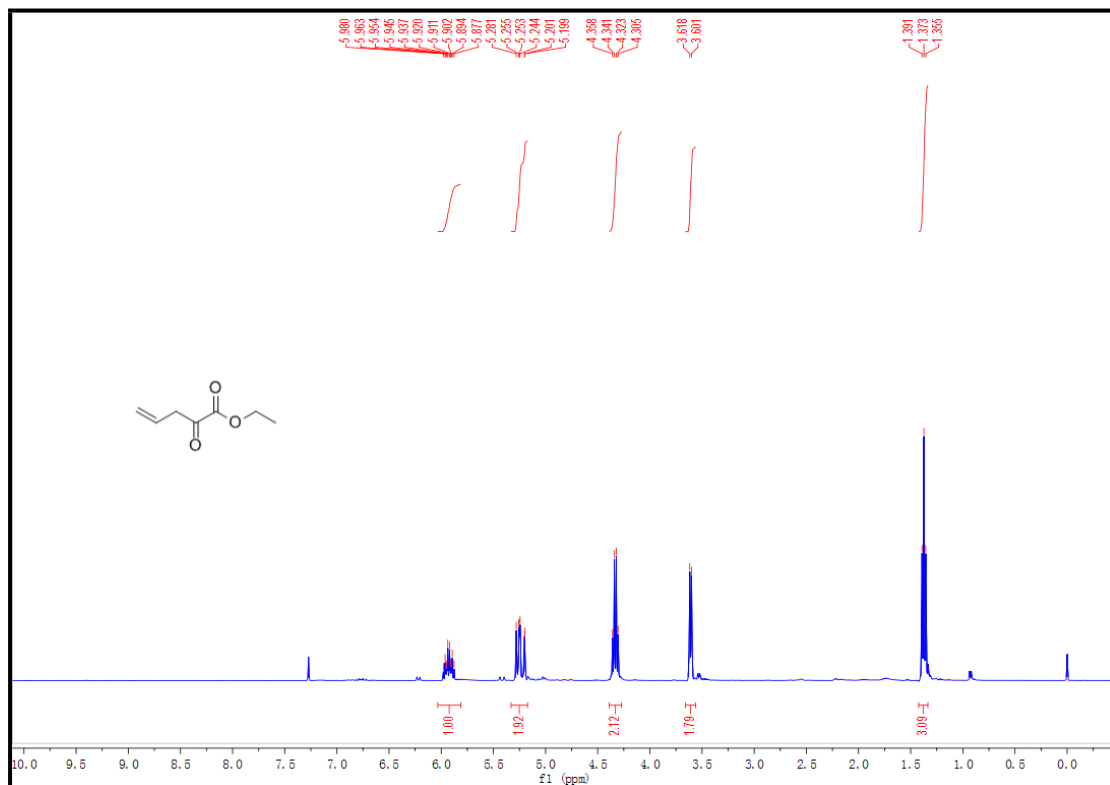

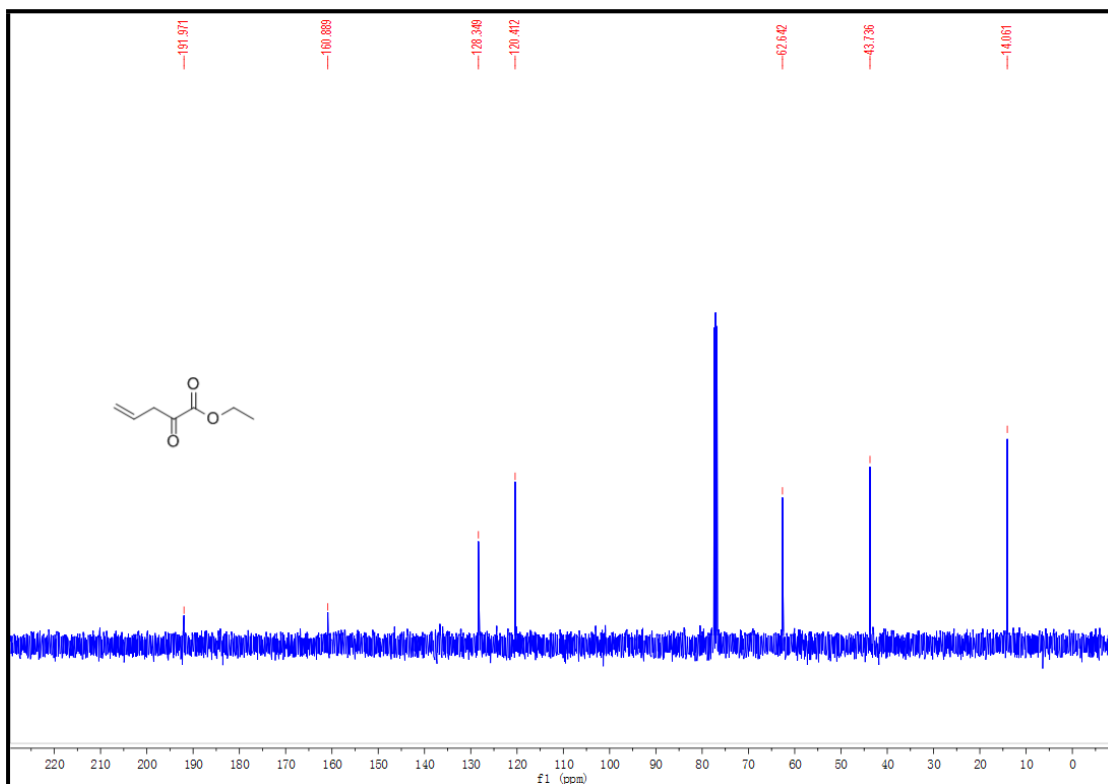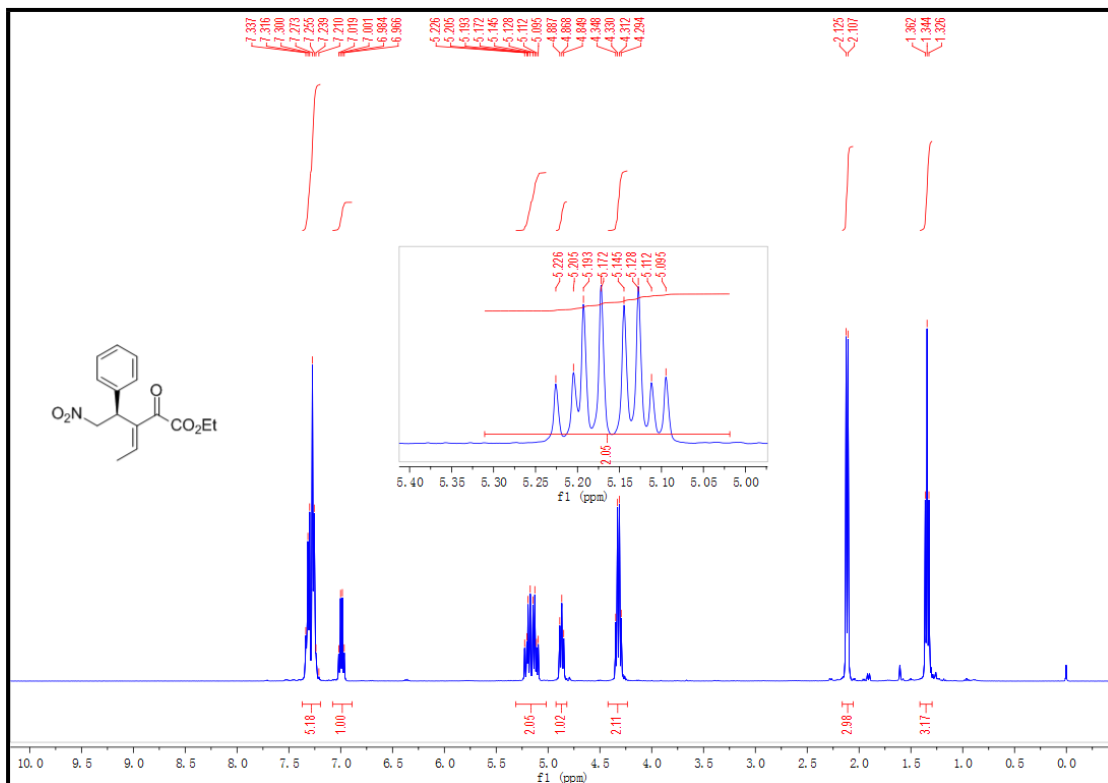

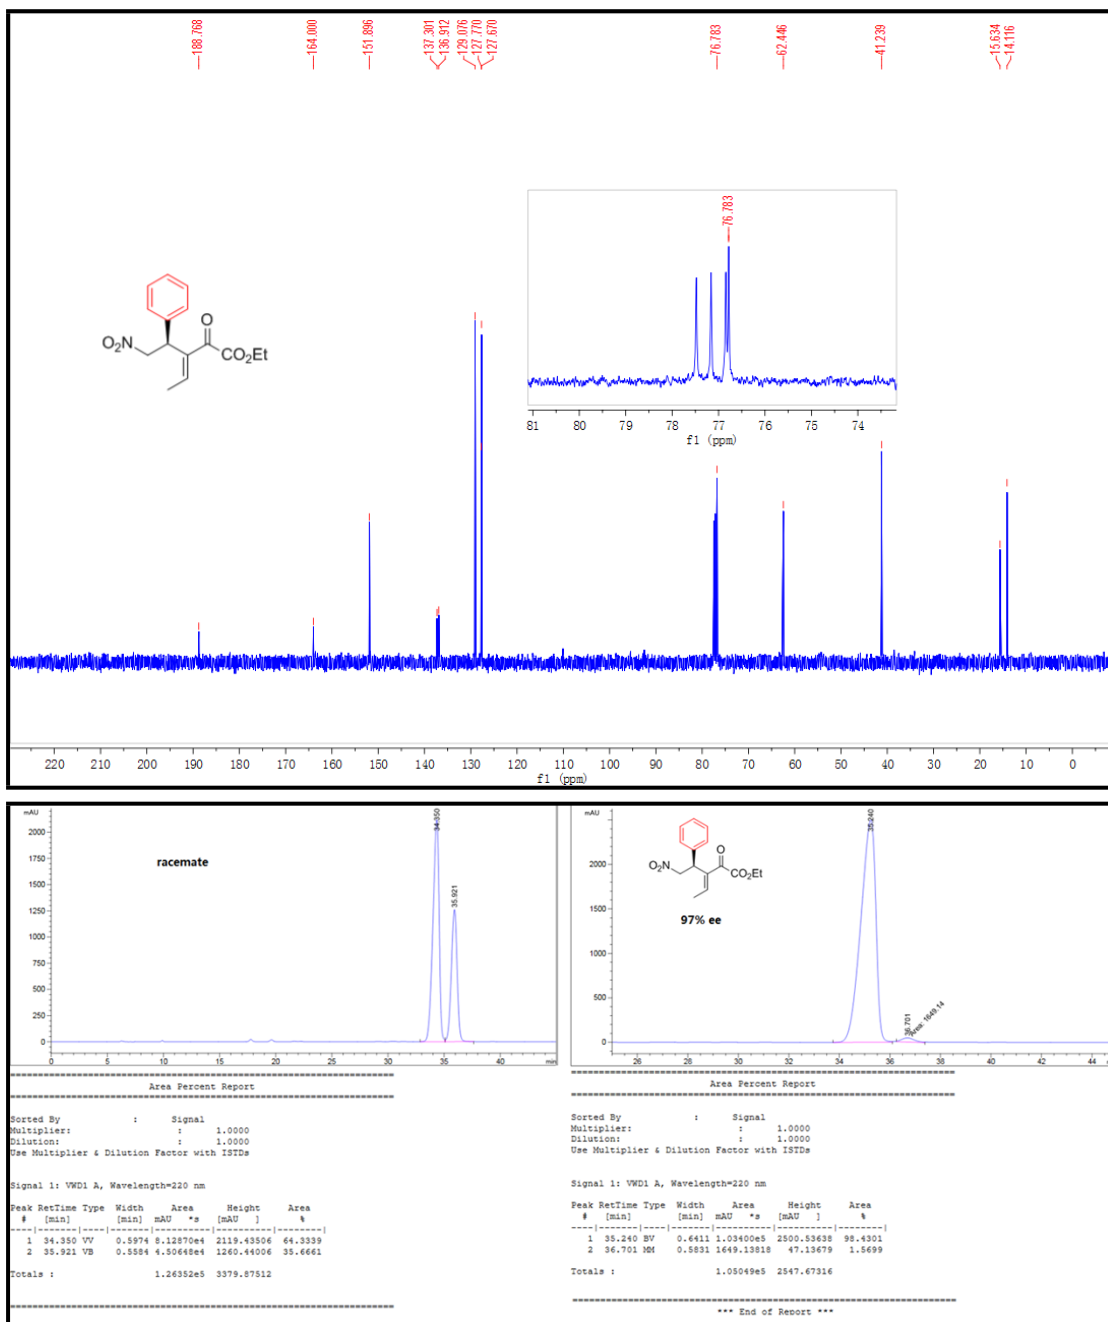

Note: the racemic product was prepared under the catalysis of racemic organocatalyst **F**, which was obtained through the mixture the equal amount of (*S,S*)-**F** and (*R,R*)-**F** isomers.



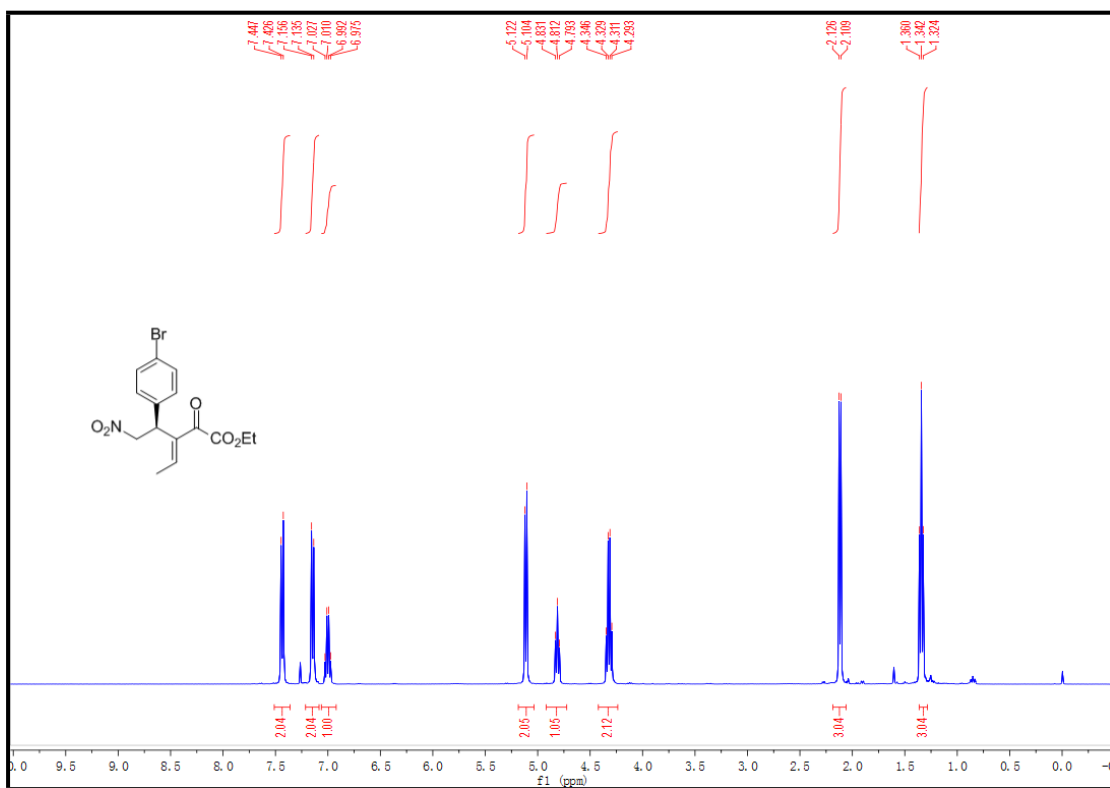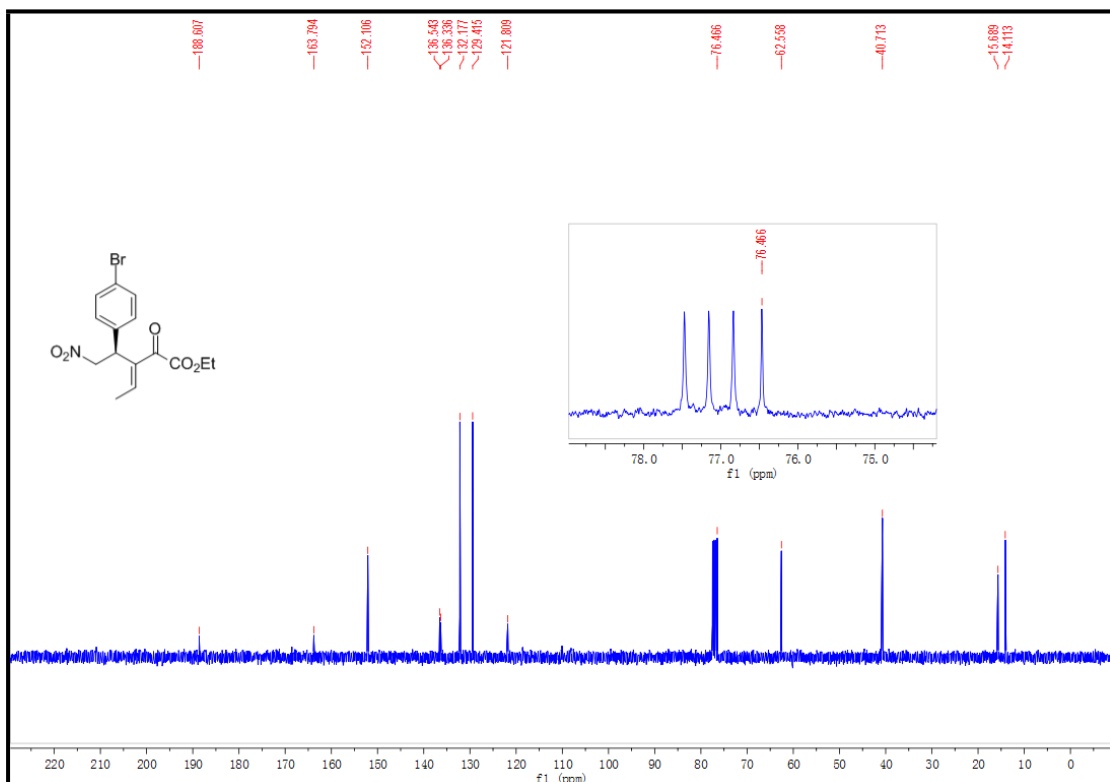

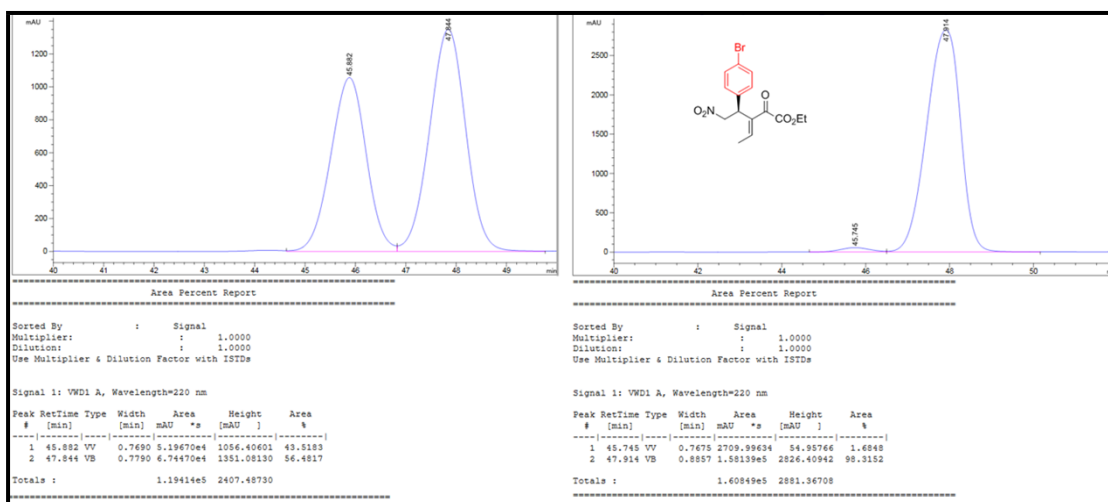

Note: the racemic product was prepared under the catalysis of racemic organocatalyst **F**, which was obtained through the mixture the equal amount of (*S,S*)-**F** and (*R,R*)-**F** isomers.

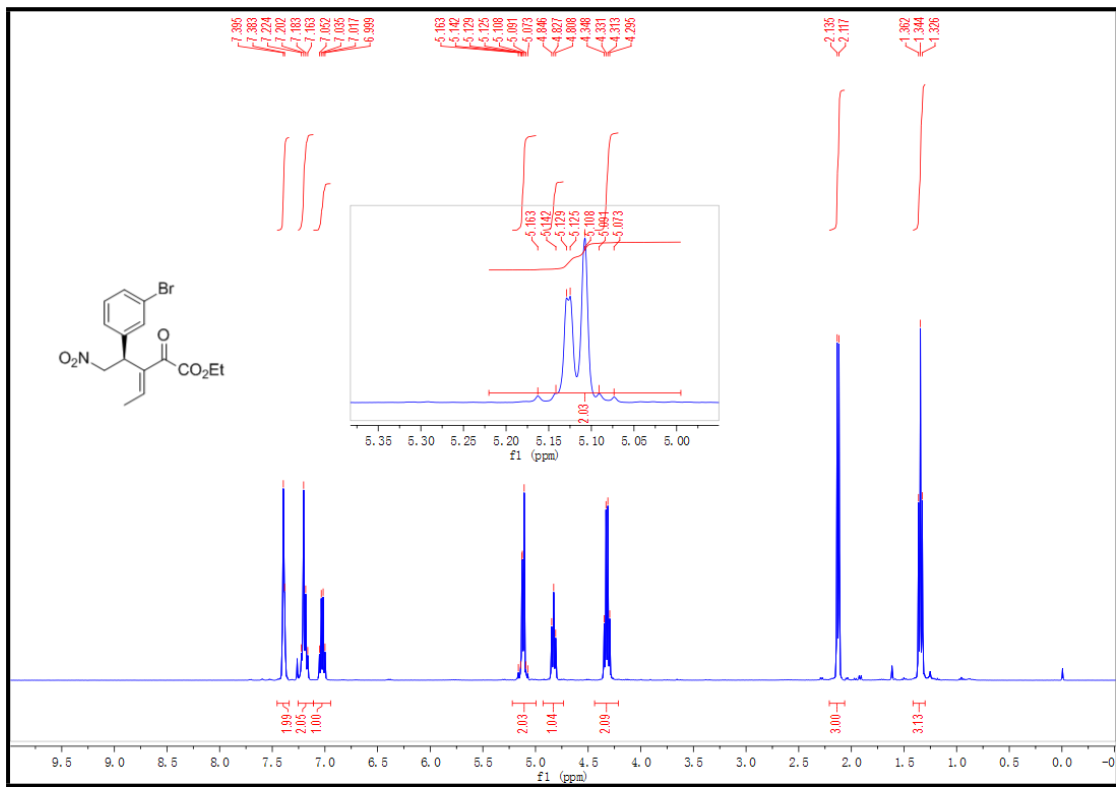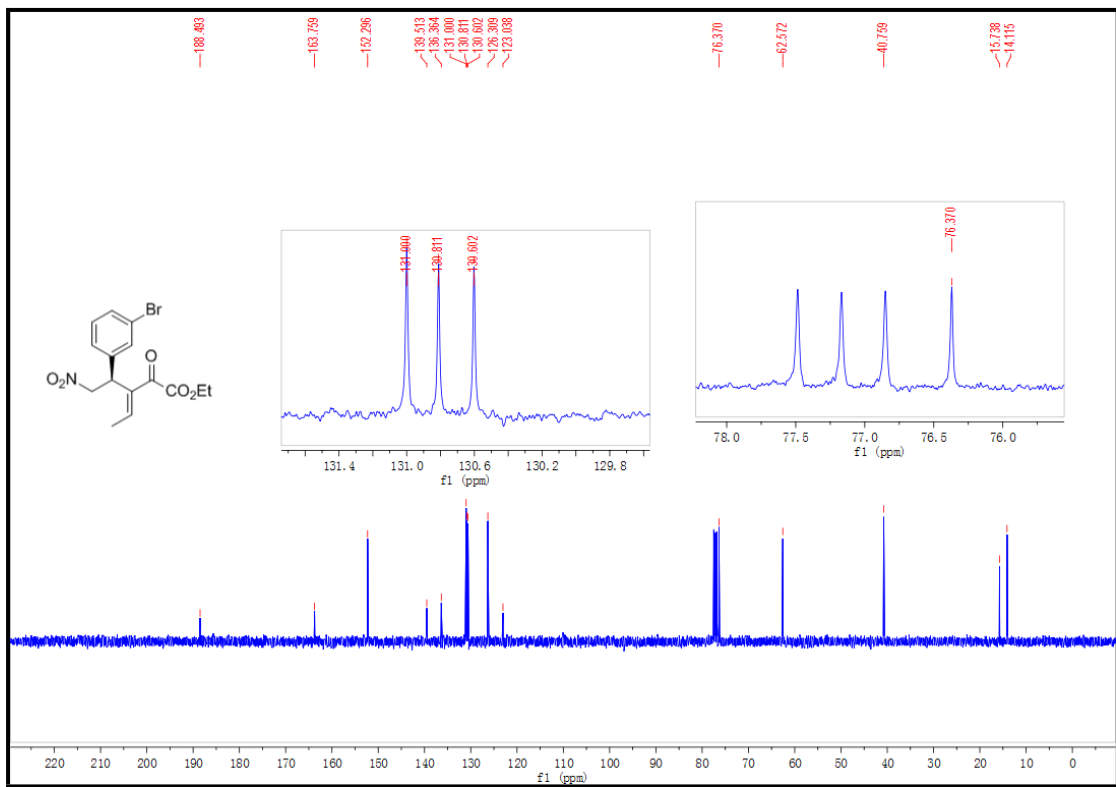

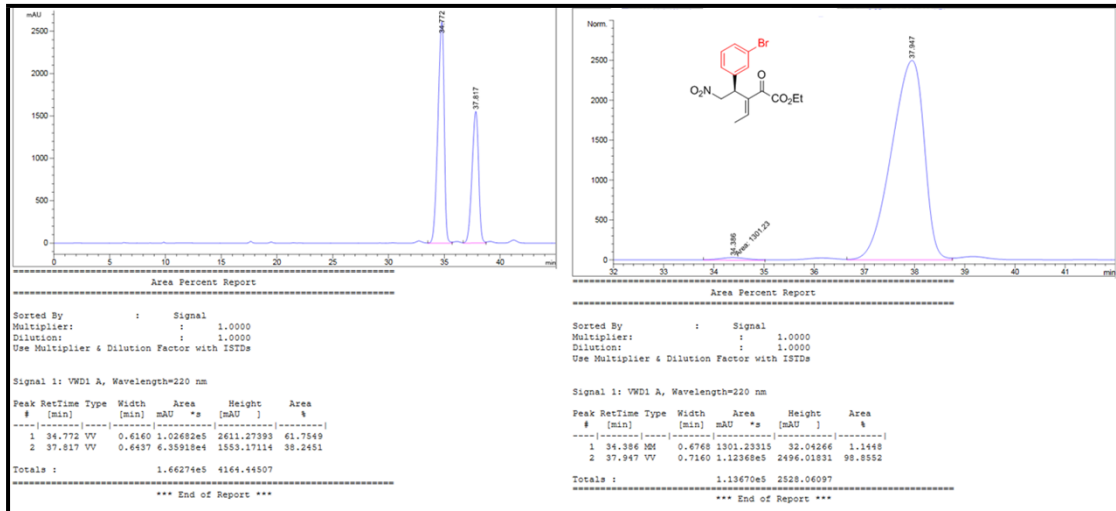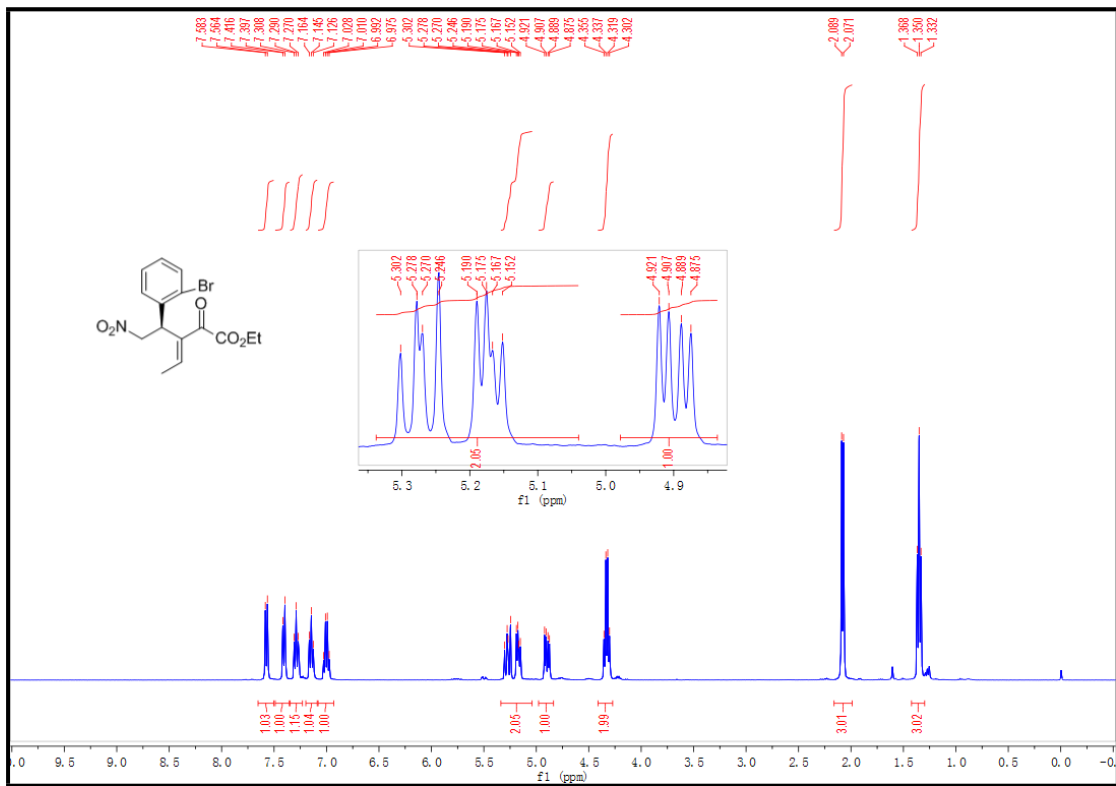

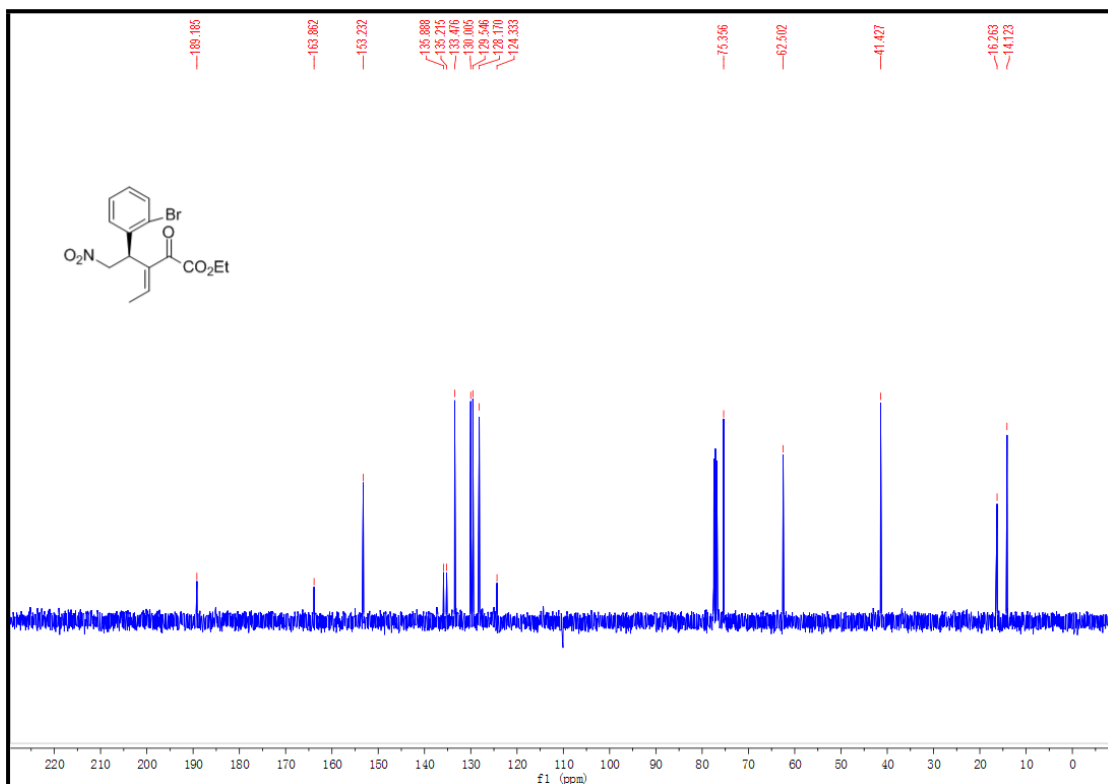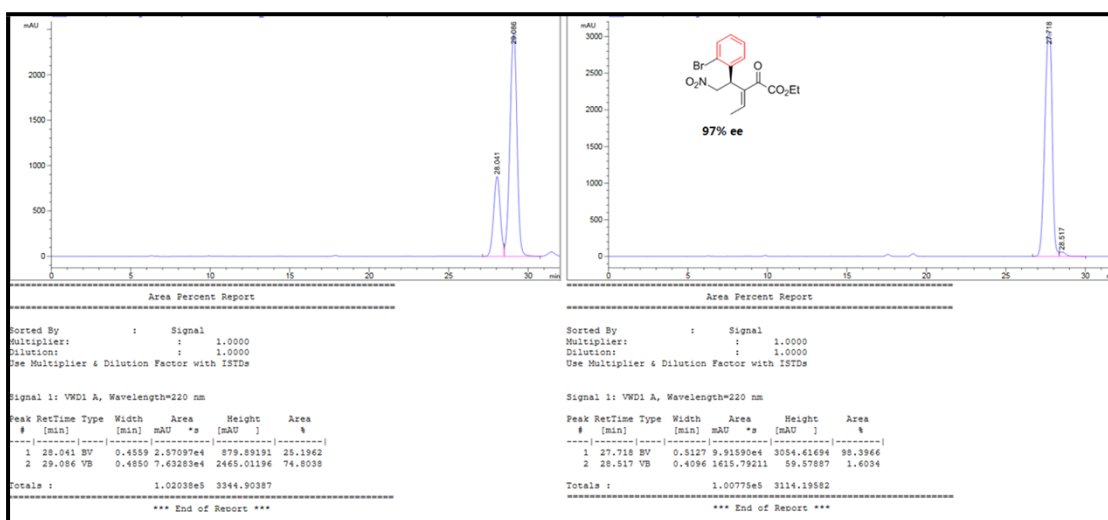

Note: the racemic product was prepared under the catalysis of racemic organocatalyst **F**, which was obtained through the mixture the equal amount of (*S,S*)-**F** and (*R,R*)-**F** isomers.

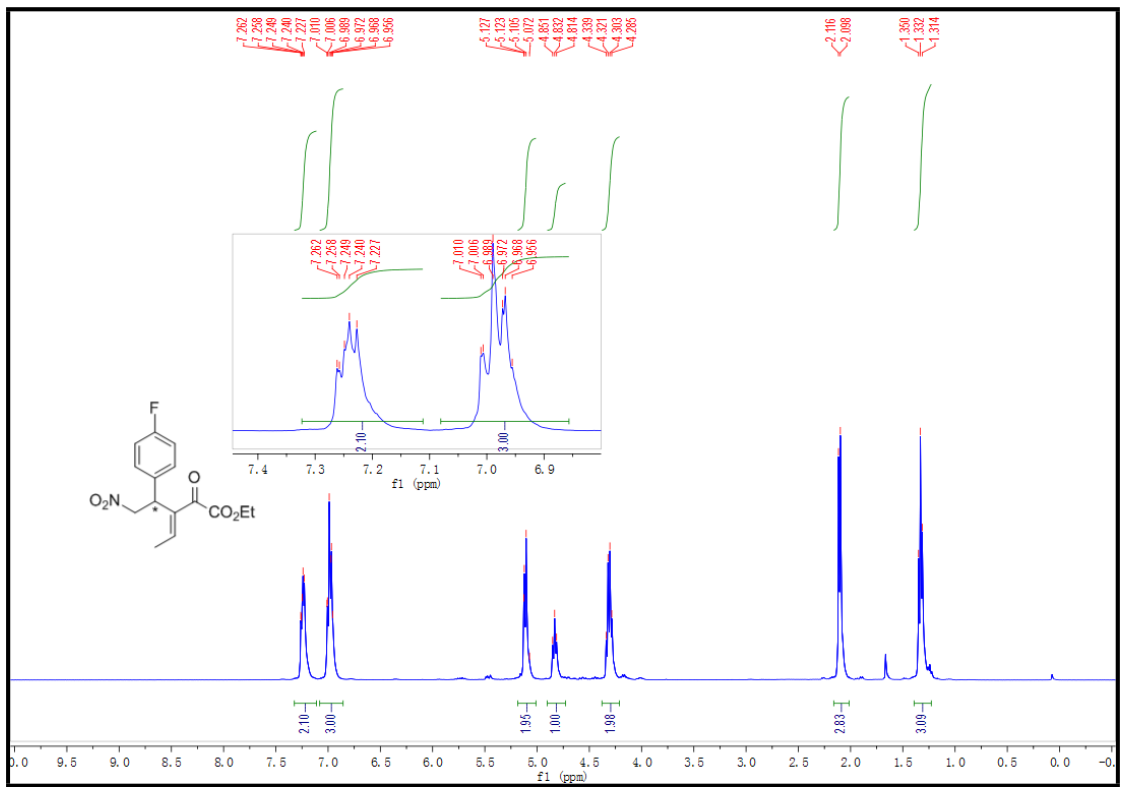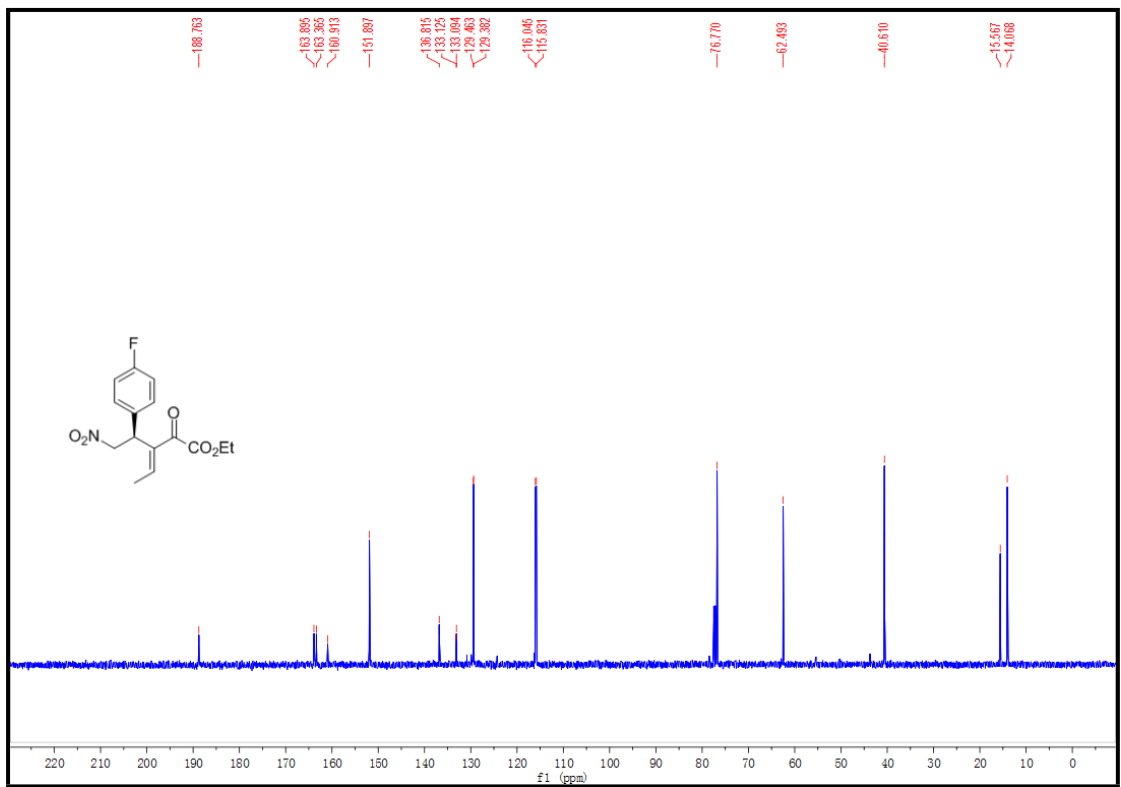

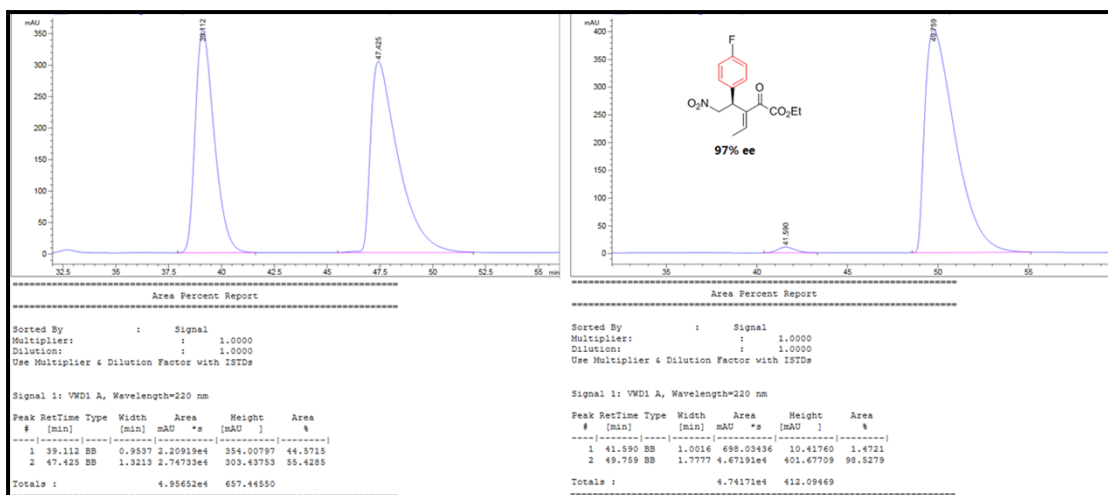

Note: the racemic product was prepared under the catalysis of racemic organocatalyst **F**, which was obtained through the mixture the equal amount of (*S,S*)-**F** and (*R,R*)-**F** isomers.

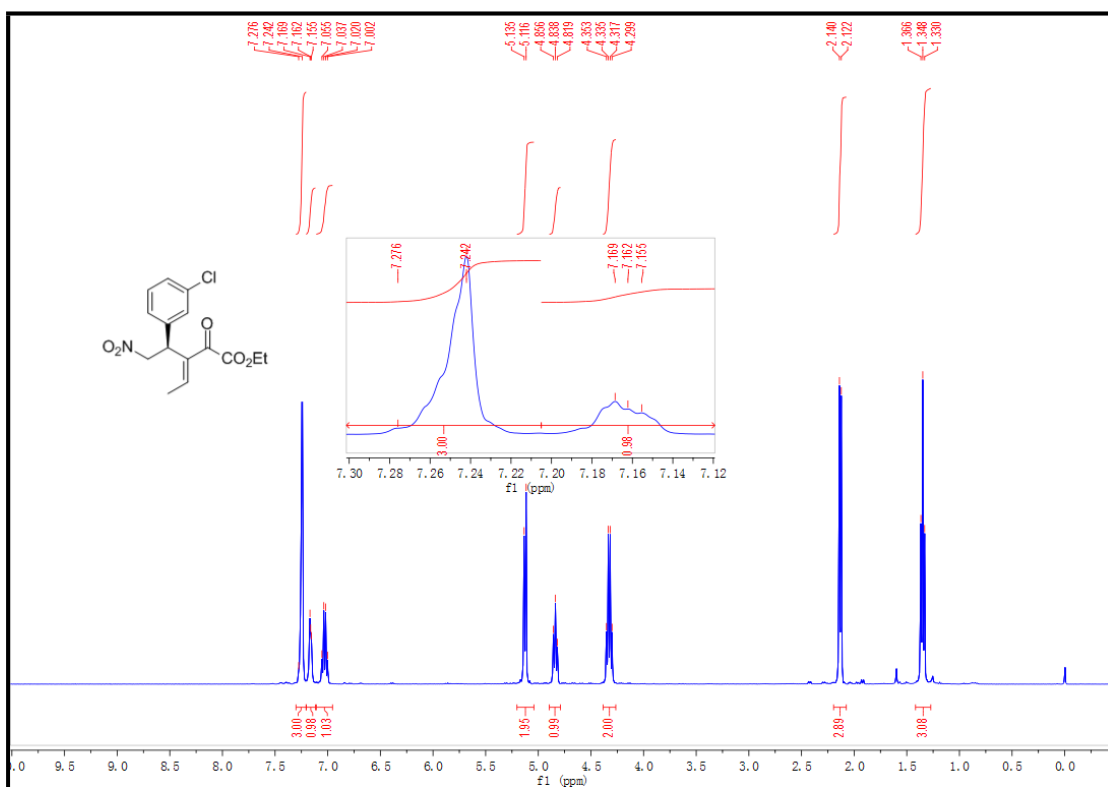

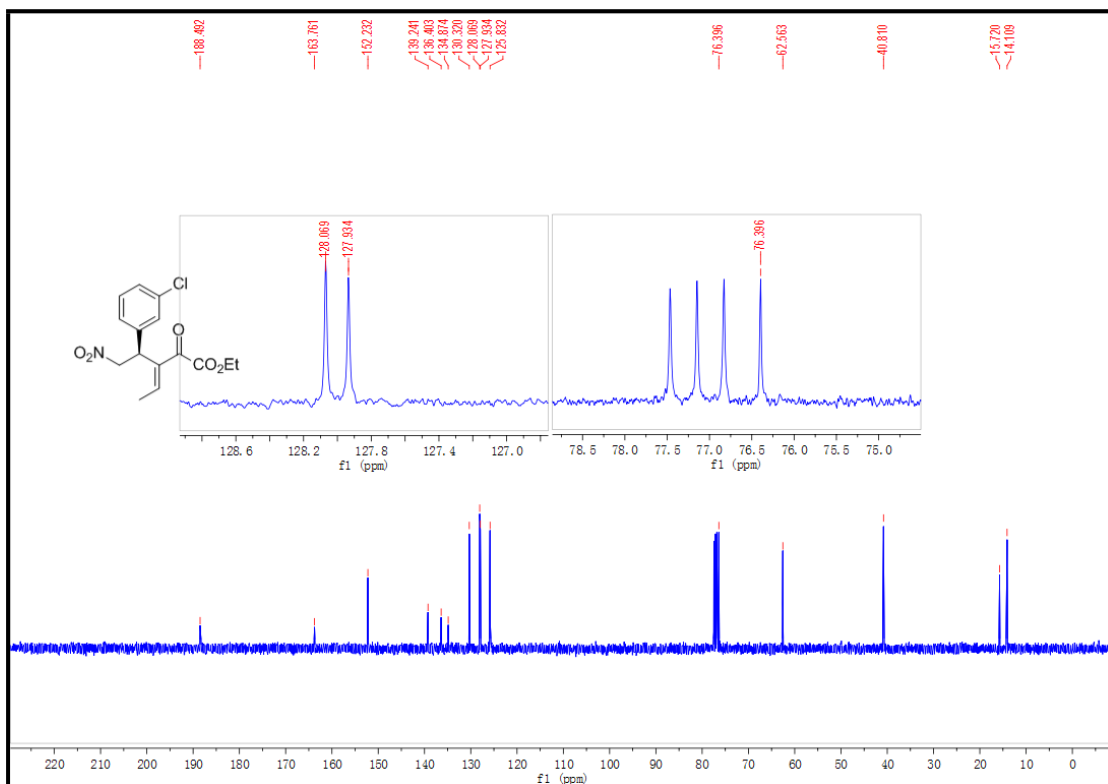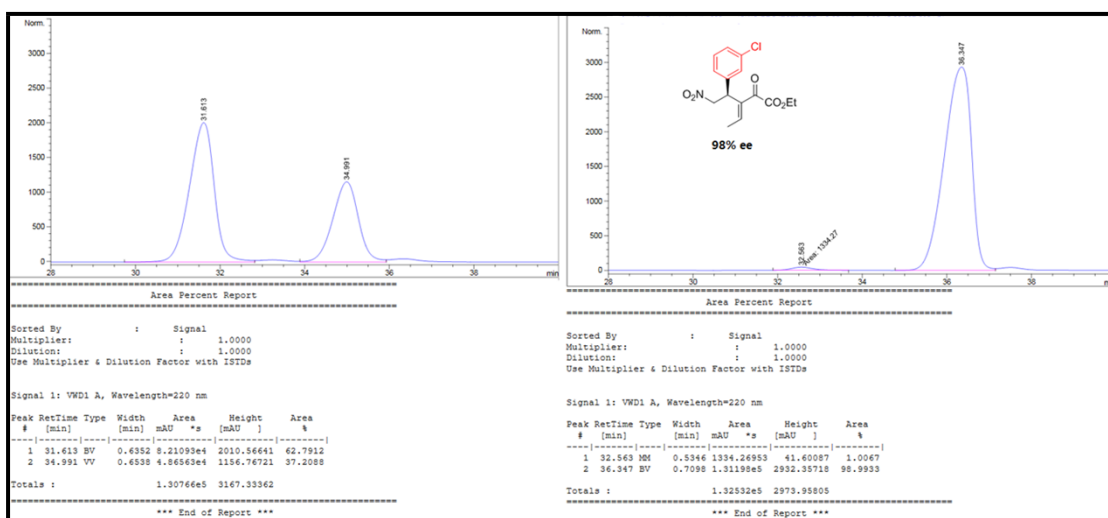

Note: the racemic product was prepared under the catalysis of racemic organocatalyst **F**, which was obtained through the mixture the equal amount of (*S,S*)-**F** and (*R,R*)-**F** isomers.



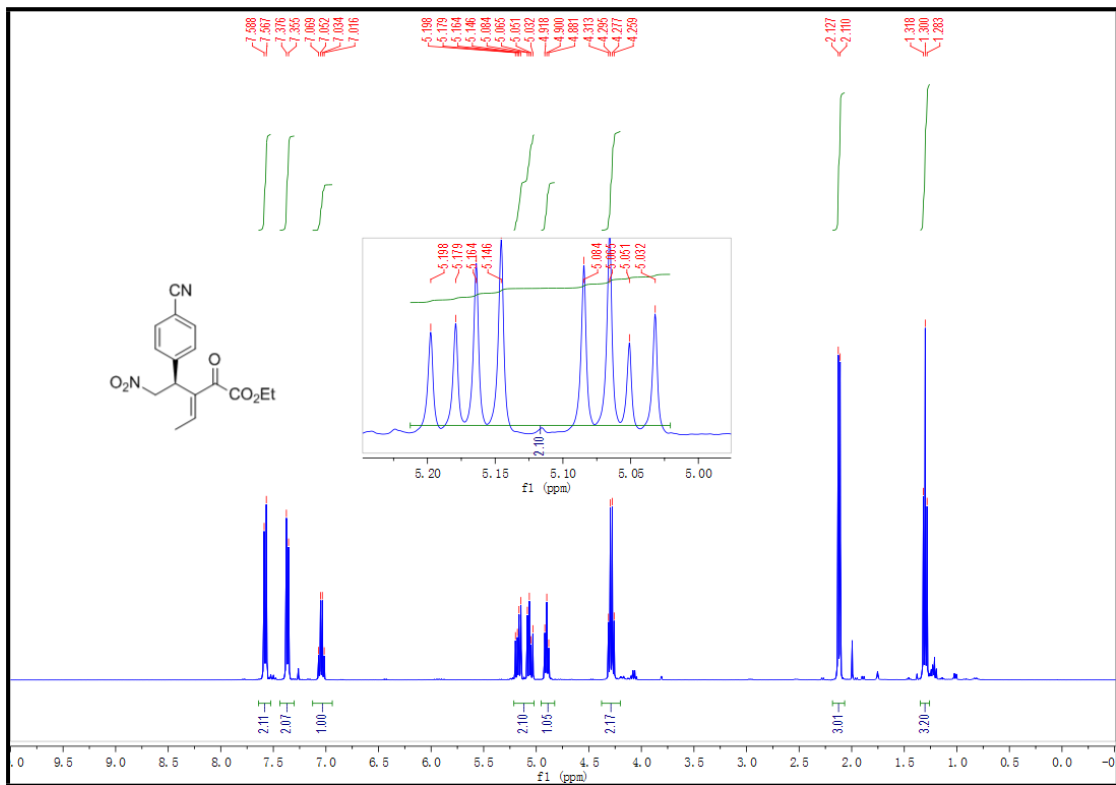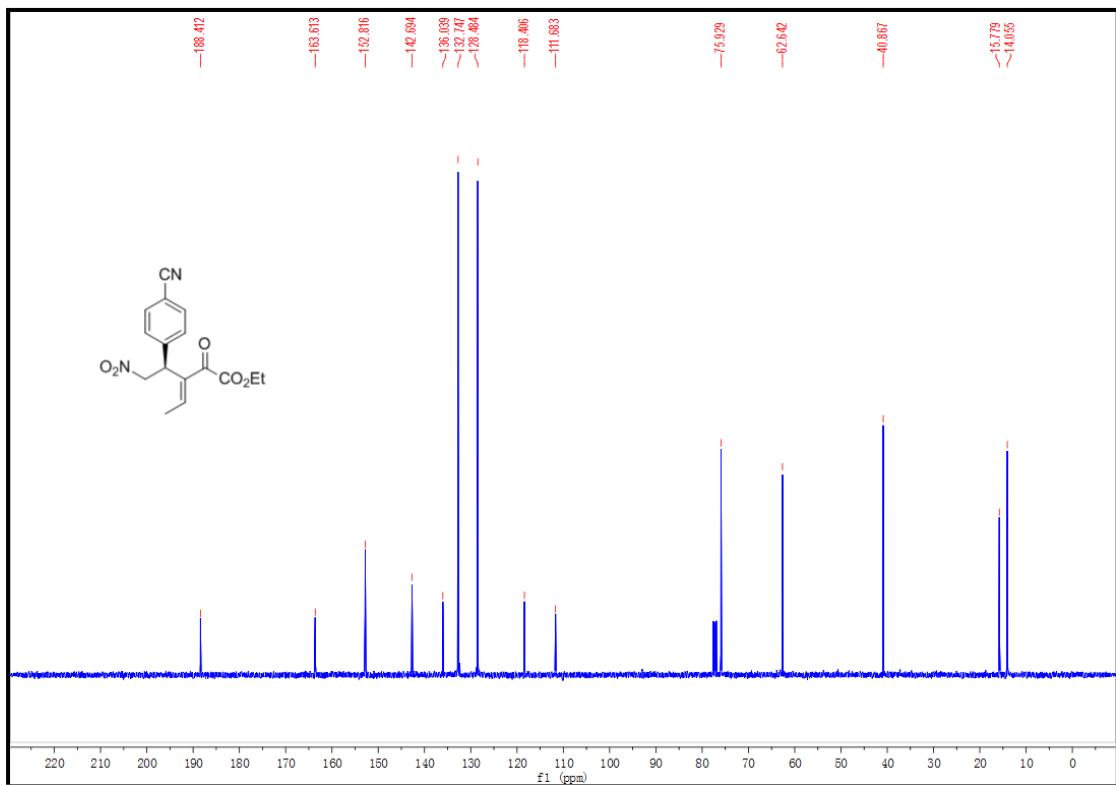

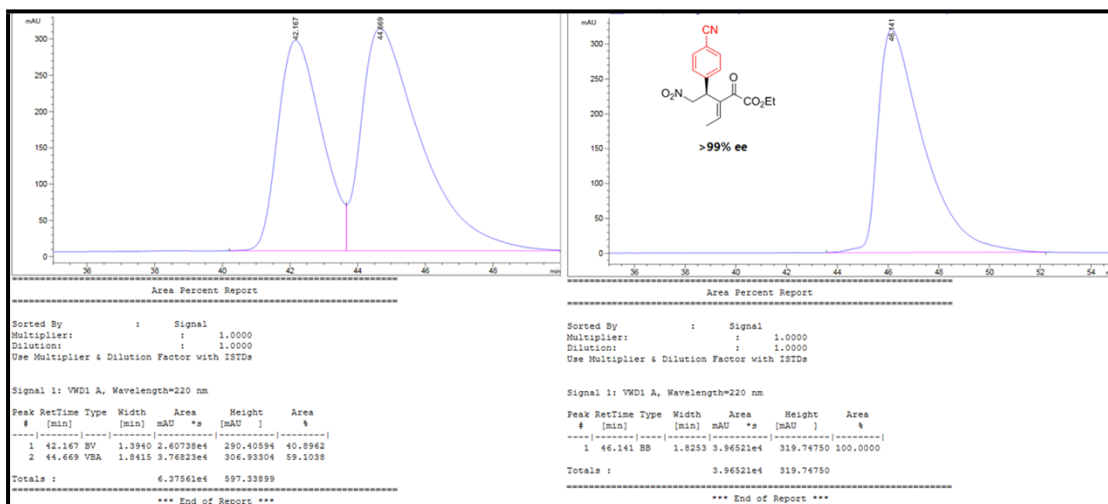

Note: the racemic product was prepared under the catalysis of racemic organocatalyst **F**, which was obtained through the mixture the equal amount of (*S,S*)-**F** and (*R,R*)-**F** isomers.

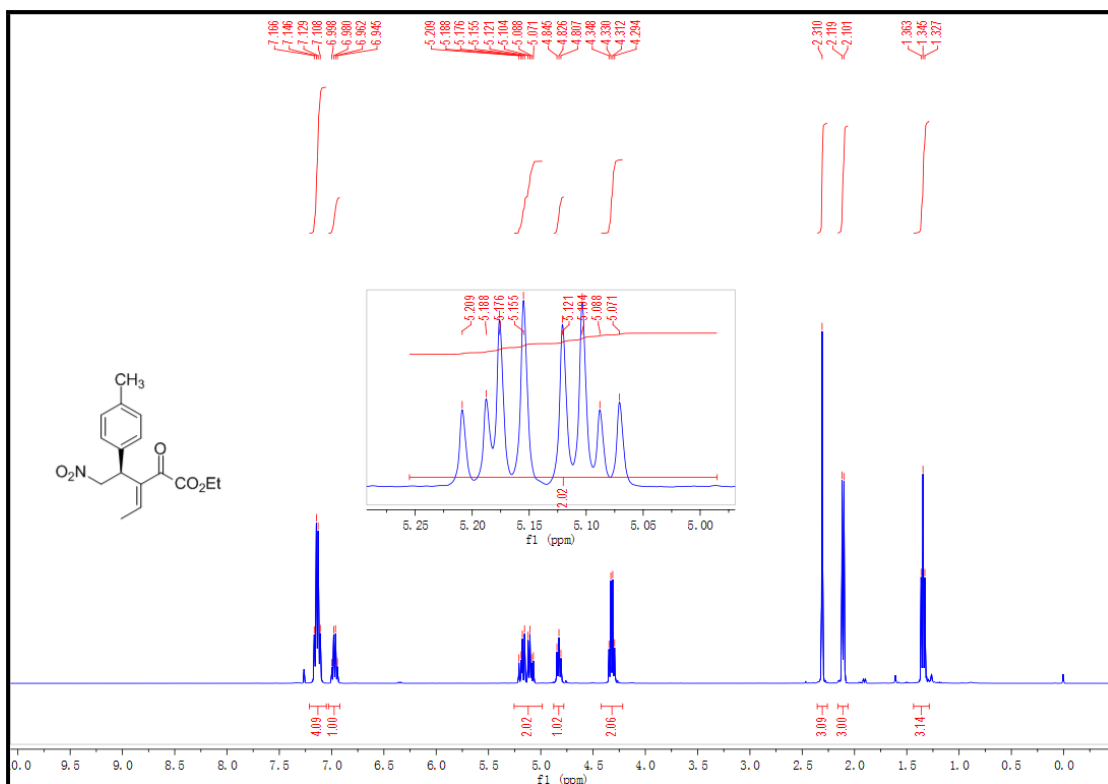

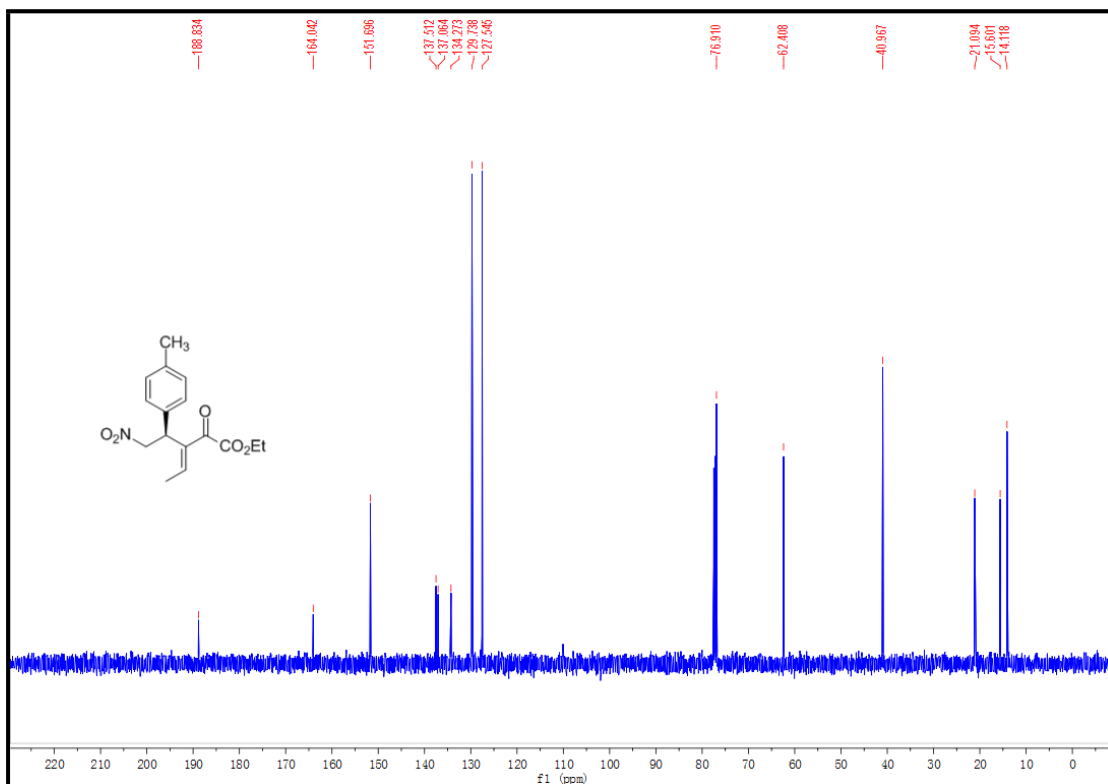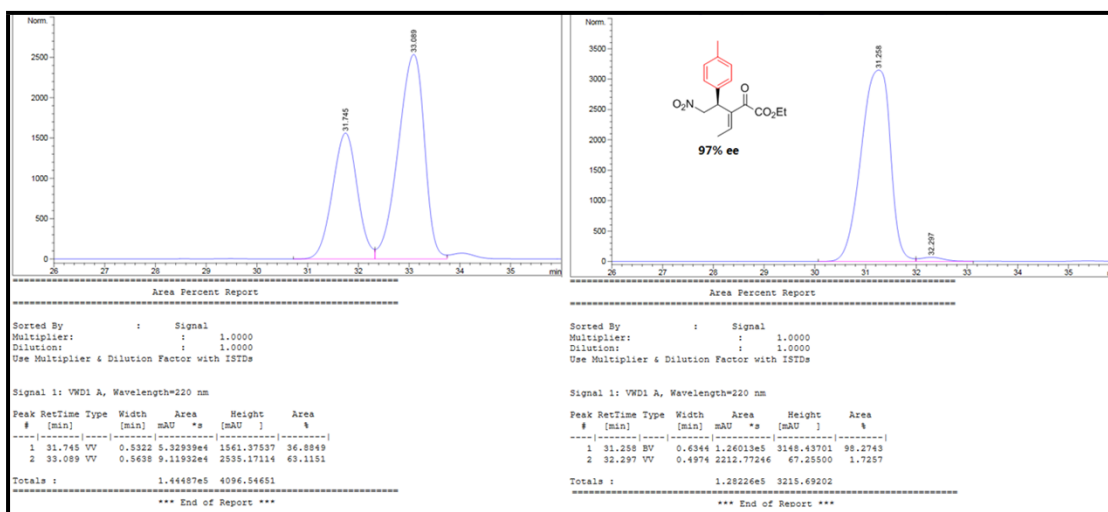

Note: the racemic product was prepared under the catalysis of racemic organocatalyst **F**, which was obtained through the mixture the equal amount of (*S,S*)-**F** and (*R,R*)-**F** isomers.

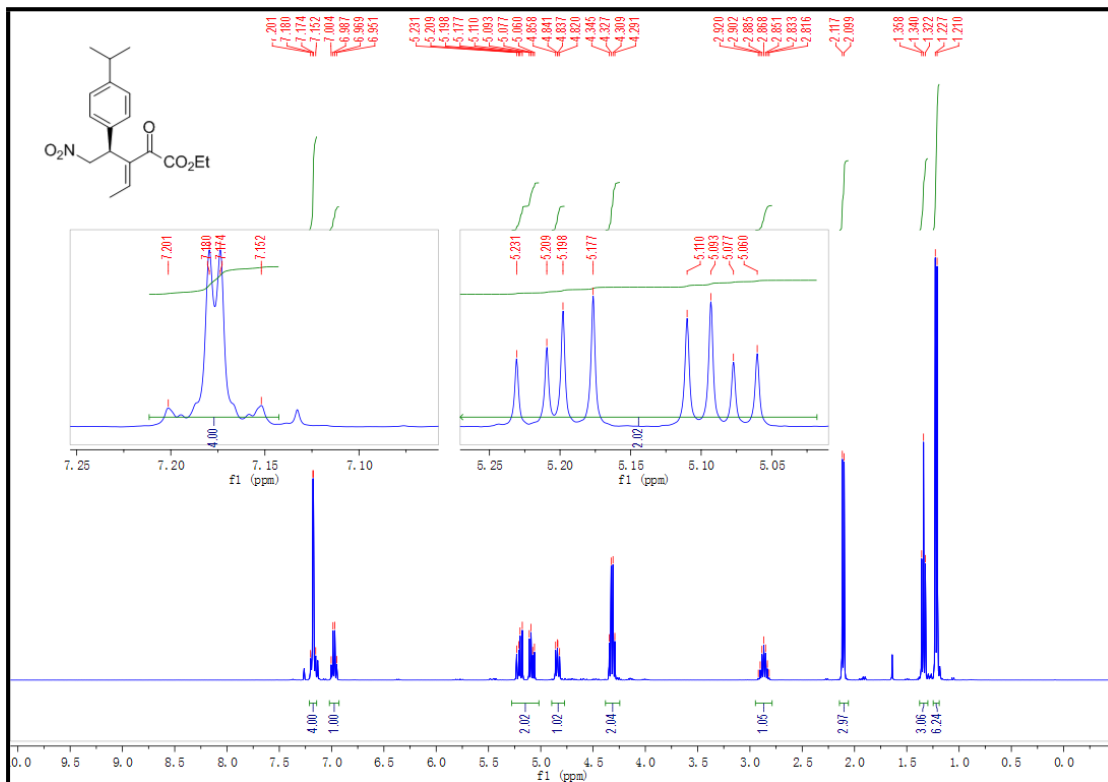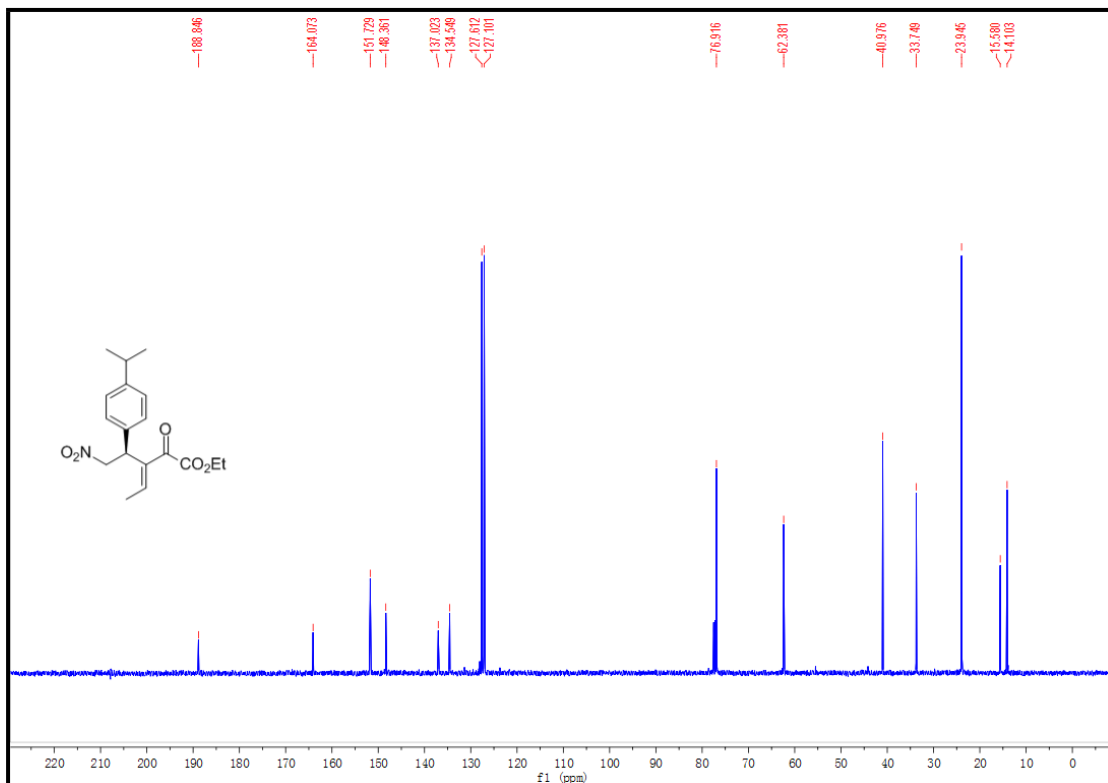

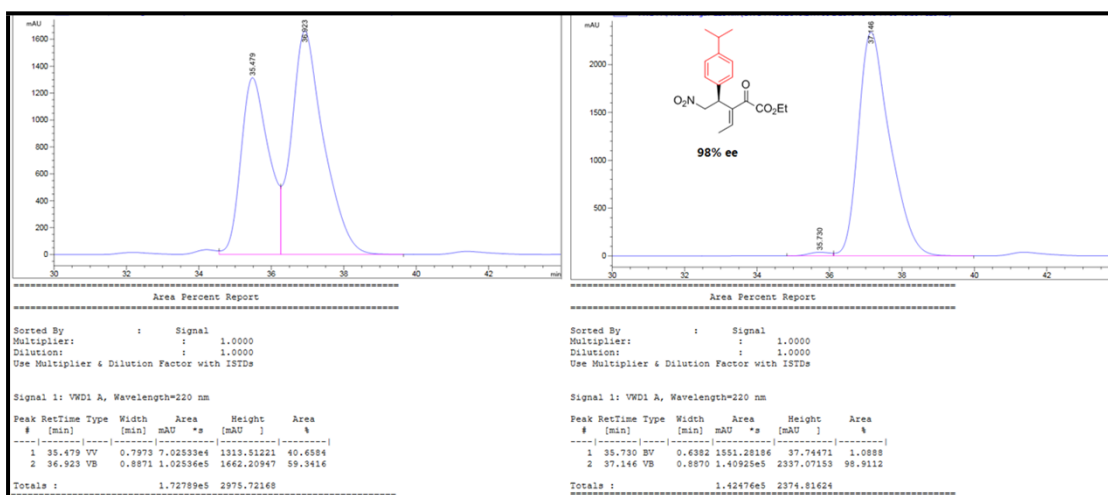

Note: the racemic product was prepared under the catalysis of racemic organocatalyst **F**, which was obtained through the mixture the equal amount of (*S,S*)-**F** and (*R,R*)-**F** isomers.

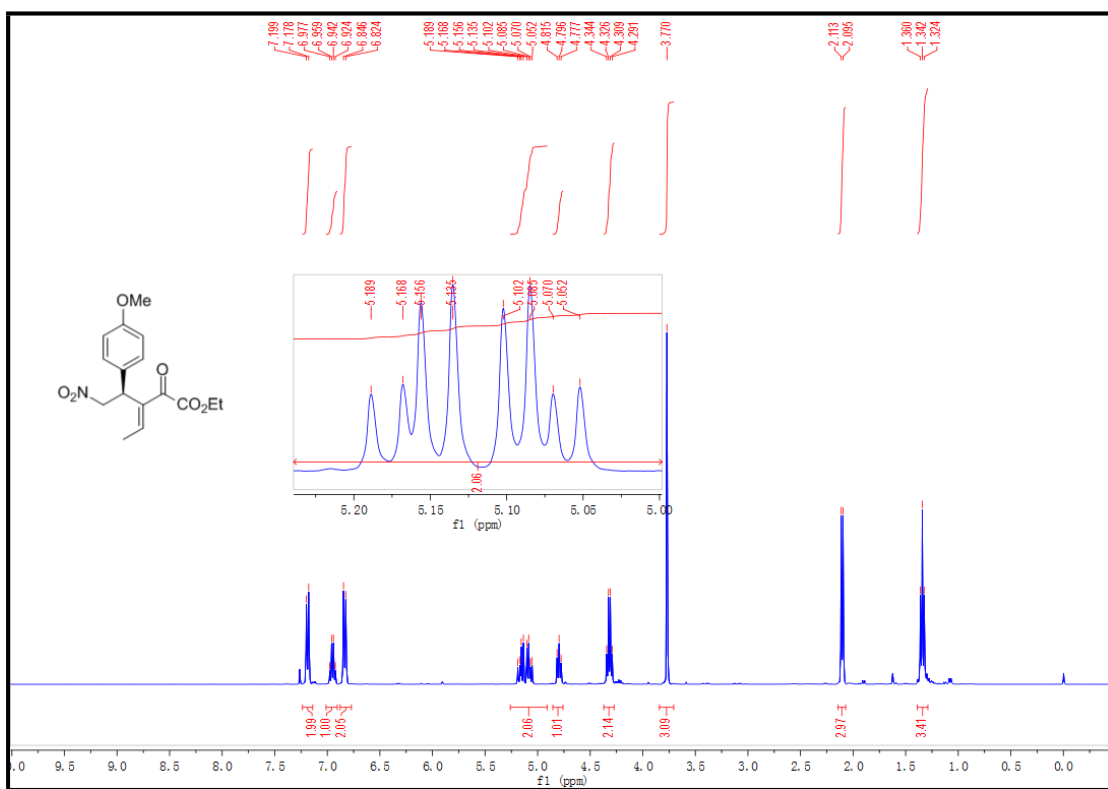

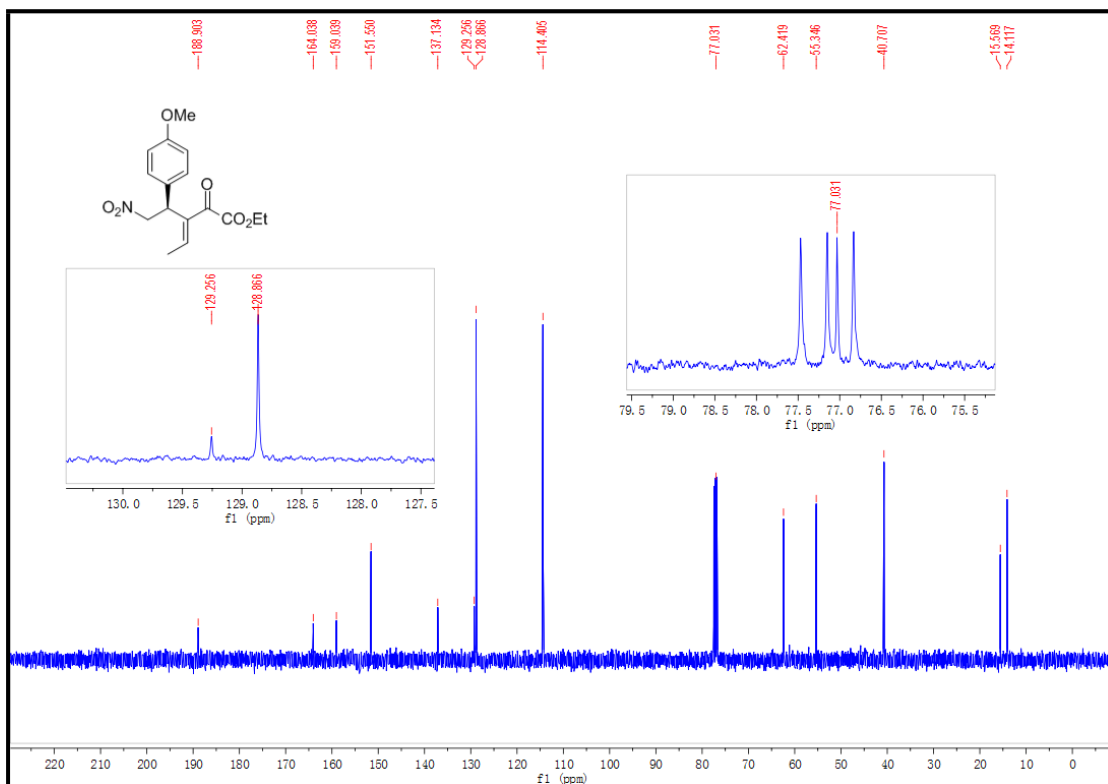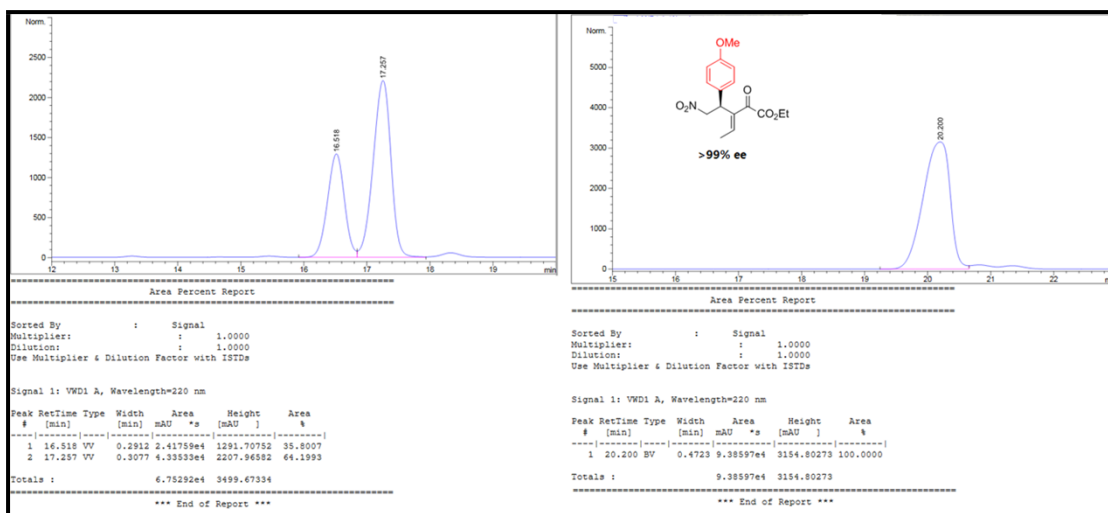

Note: the racemic product was prepared under the catalysis of racemic organocatalyst **F**, which was obtained through the mixture the equal amount of (*S,S*)-**F** and (*R,R*)-**F** isomers.

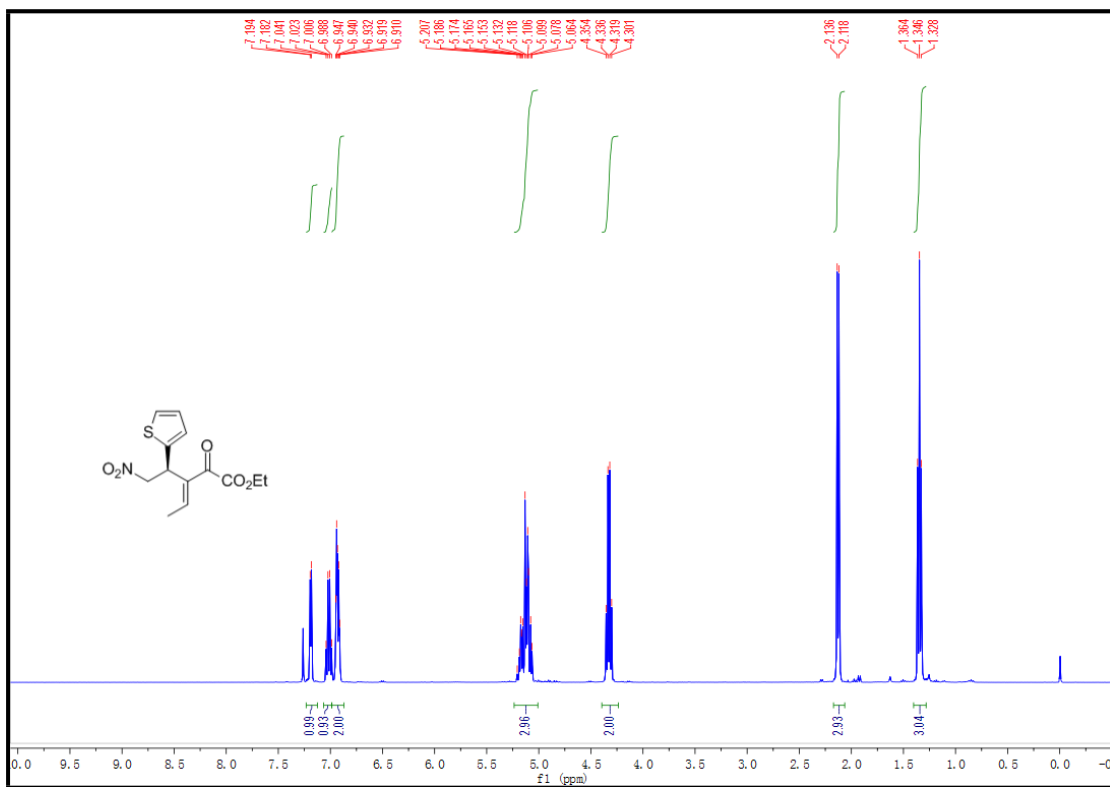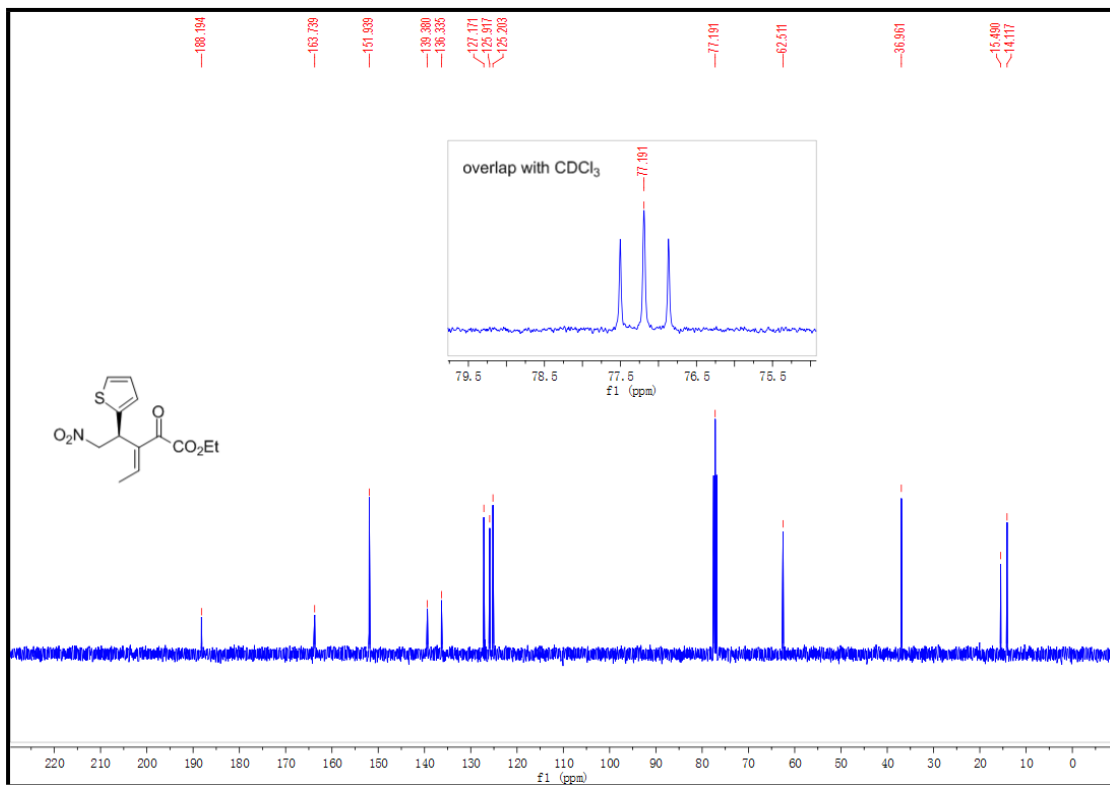

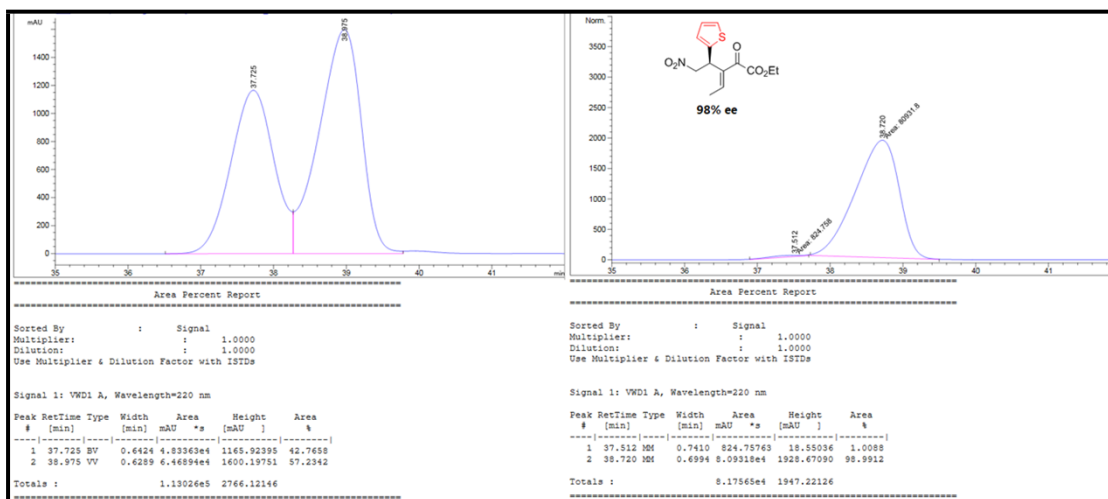

Note: the racemic product was prepared under the catalysis of racemic organocatalyst **F**, which was obtained through the mixture the equal amount of (*S,S*)-**F** and (*R,R*)-**F** isomers.

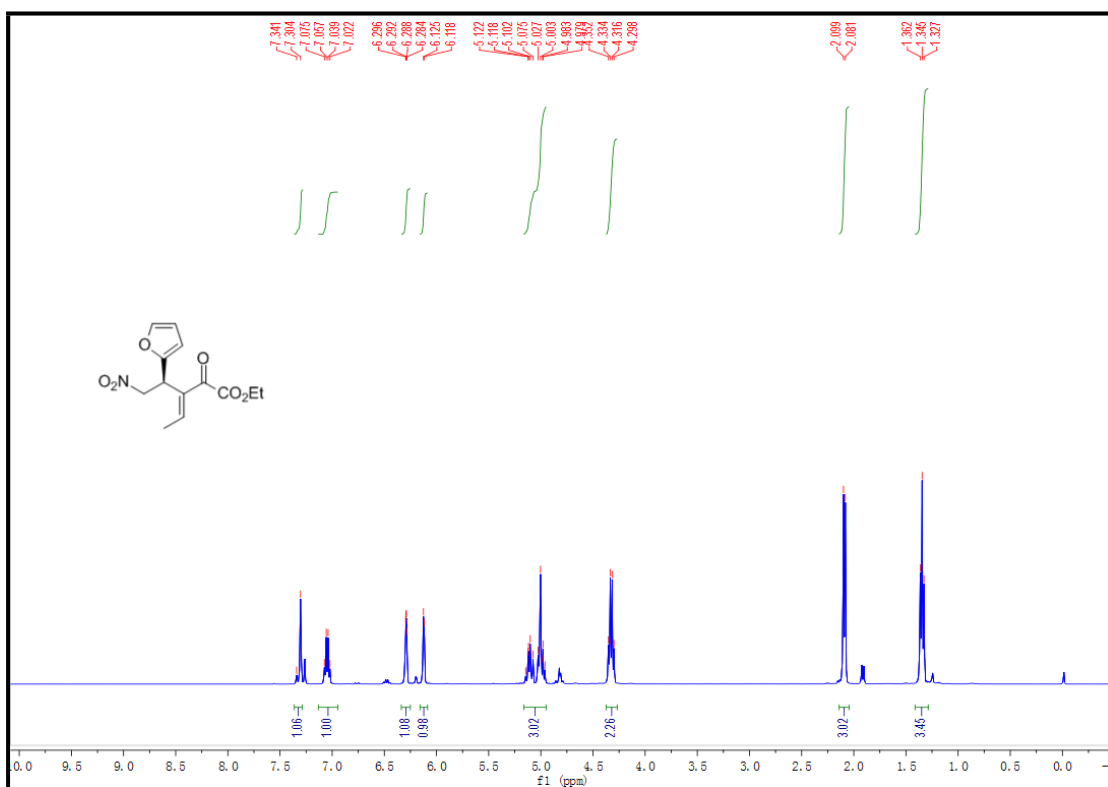



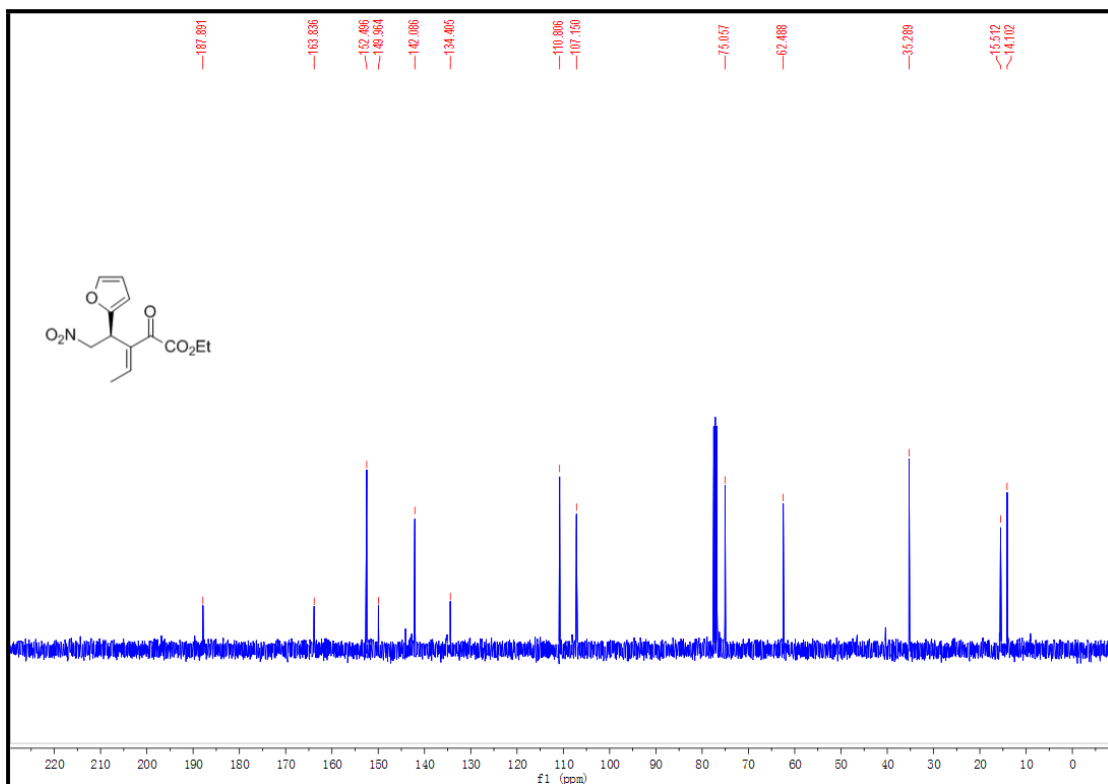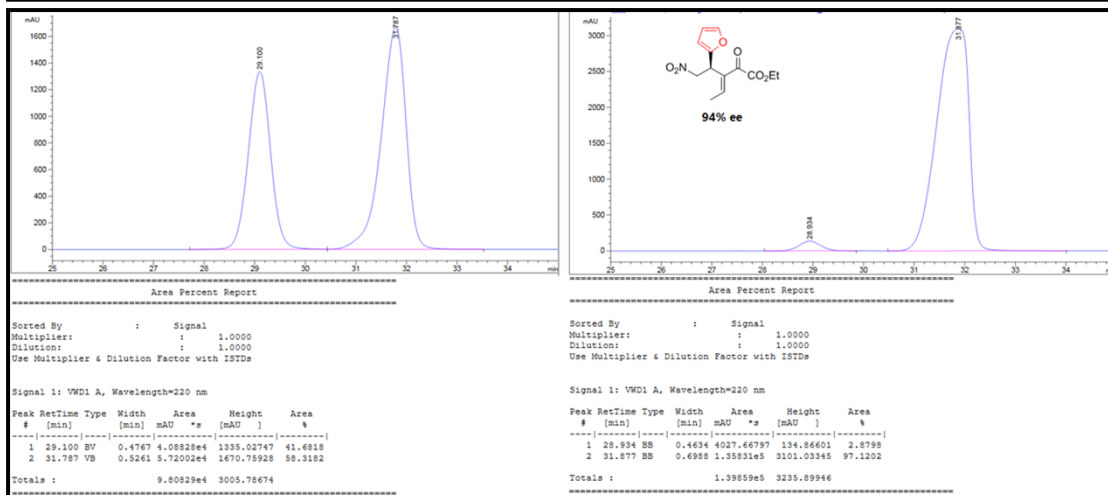

Note: the racemic product was prepared under the catalysis of racemic organocatalyst **F**, which was obtained through the mixture the equal amount of (*S,S*)-**F** and (*R,R*)-**F** isomers.

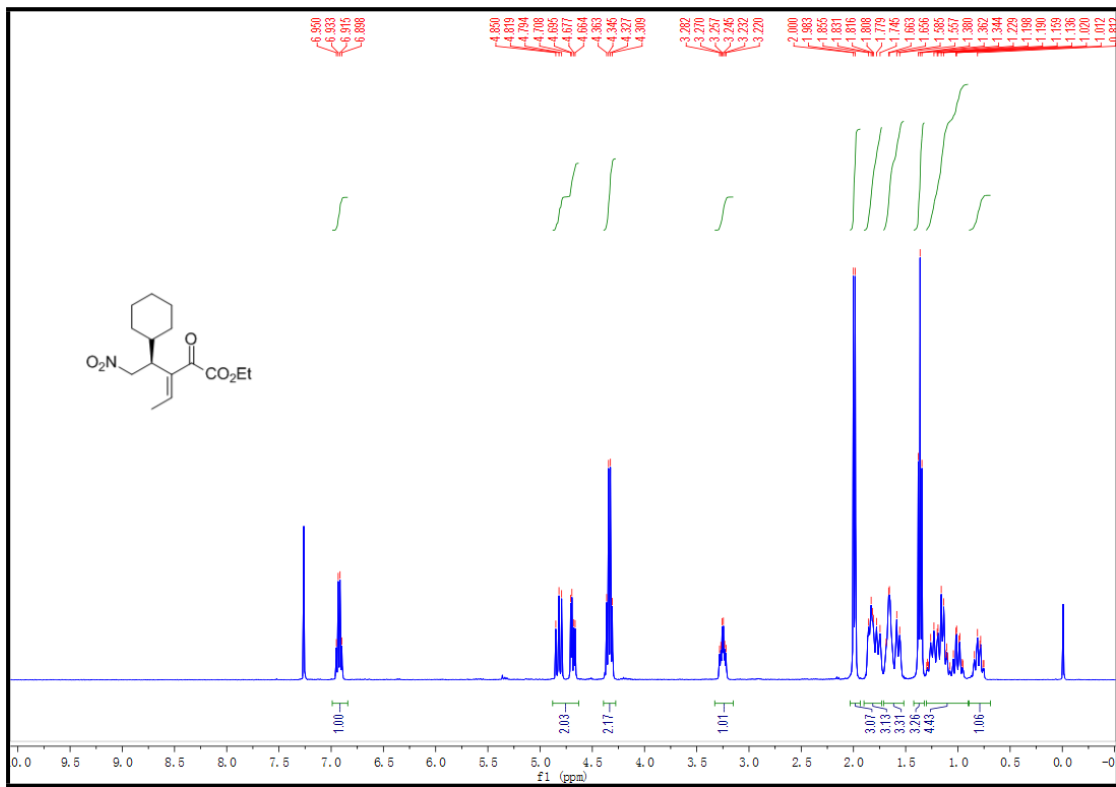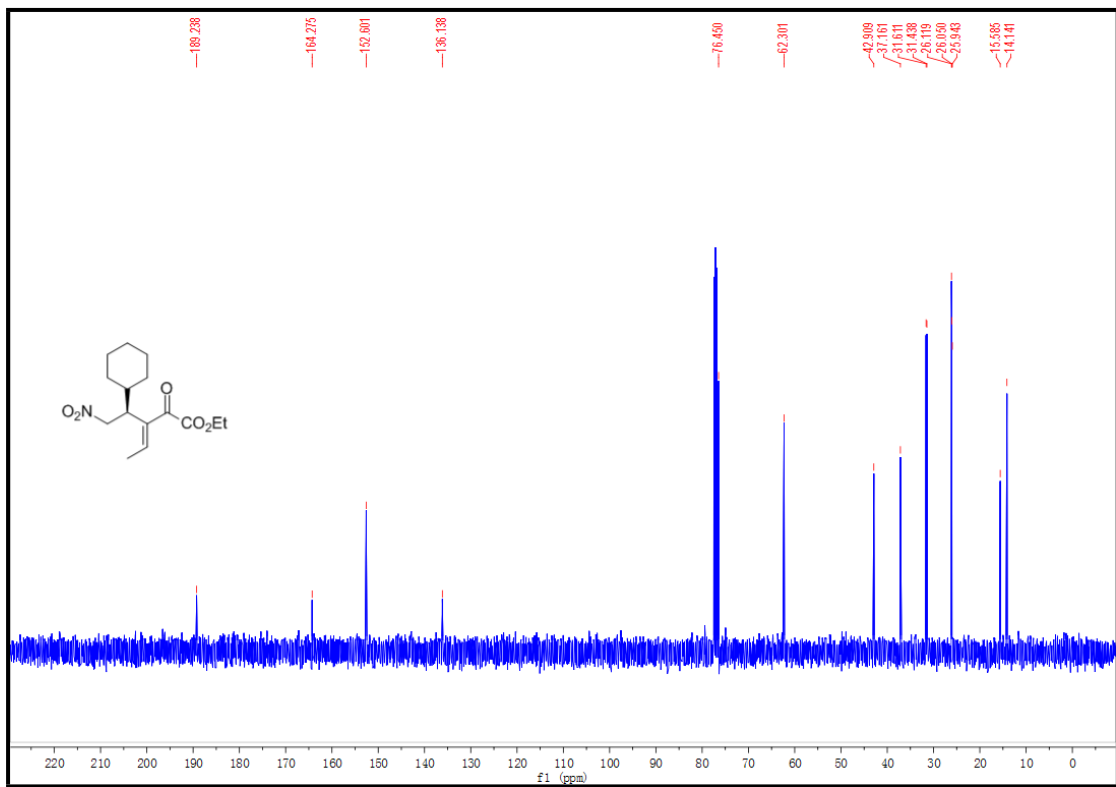

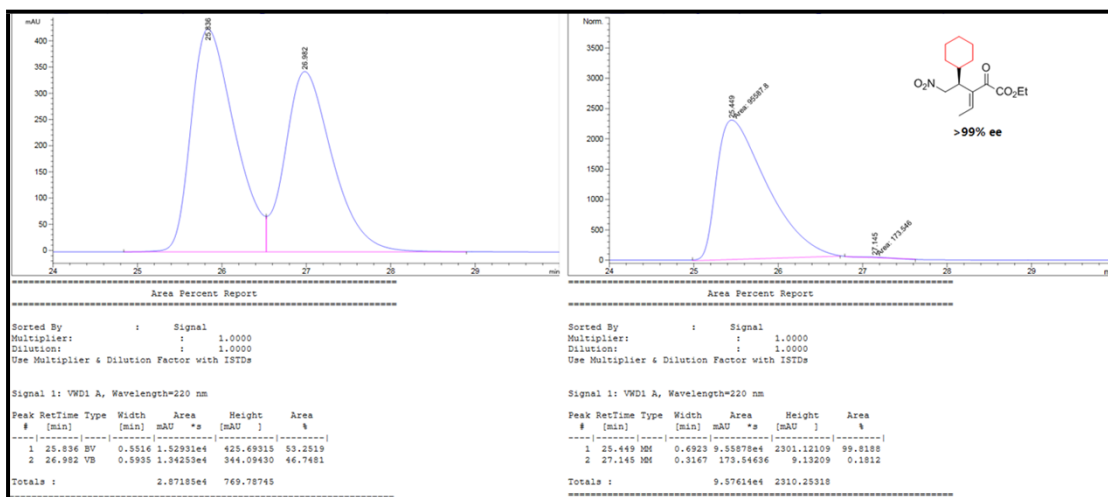

Note: the racemic product was prepared under the catalysis of racemic organocatalyst **F**, which was obtained through the mixture the equal amount of (*S,S*)-**F** and (*R,R*)-**F** isomers.

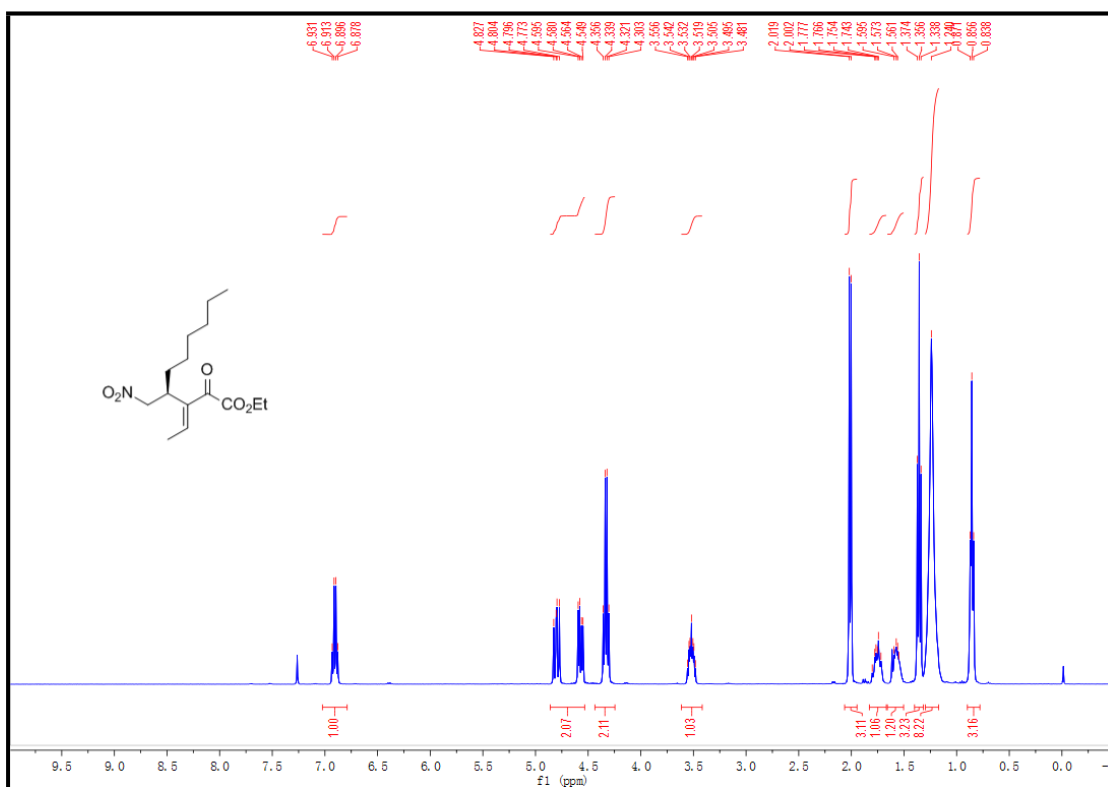

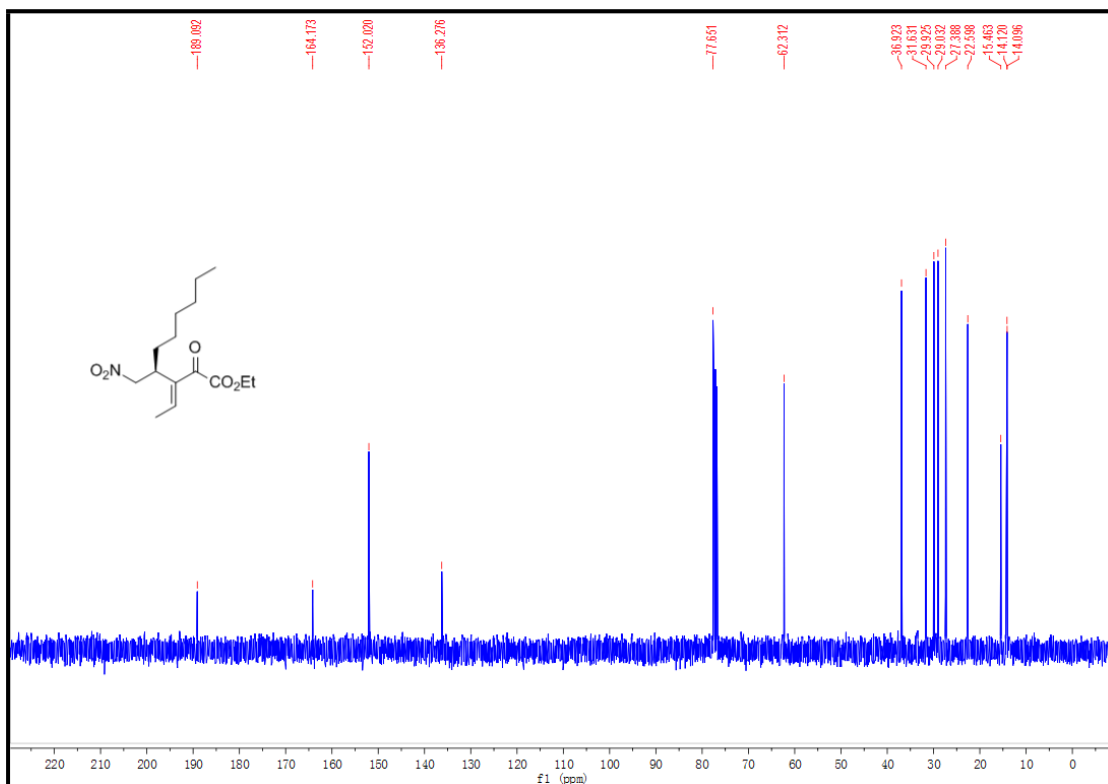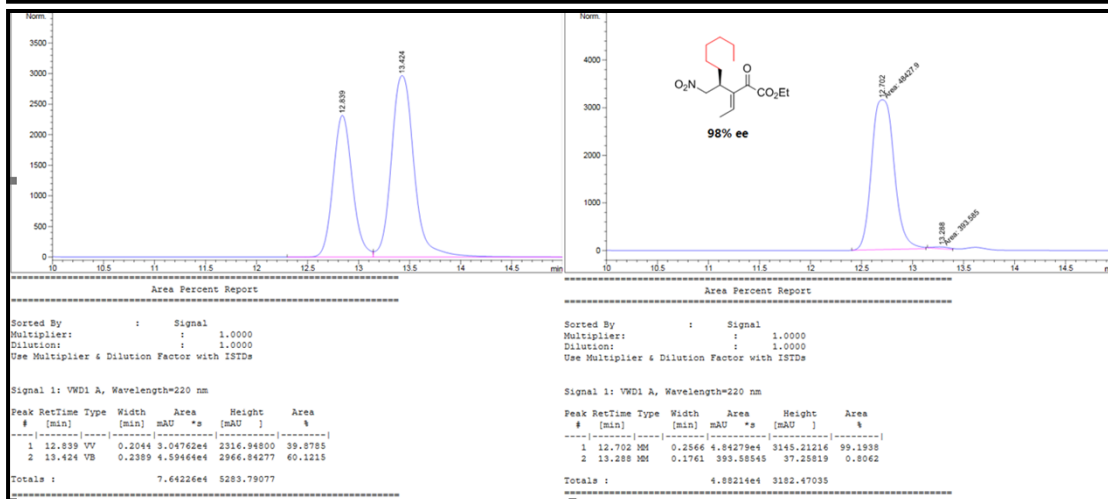

Note: the racemic product was prepared under the catalysis of racemic organocatalyst **F**, which was obtained through the mixture the equal amount of (*S,S*)-**F** and (*R,R*)-**F** isomers.

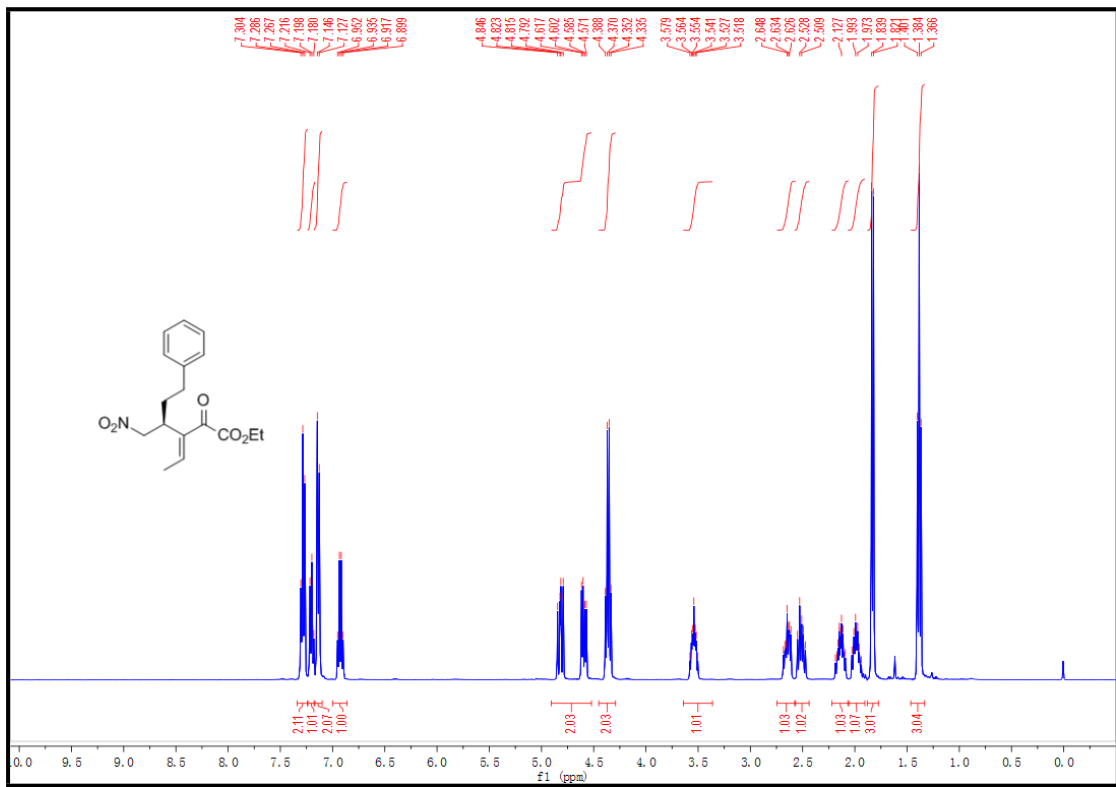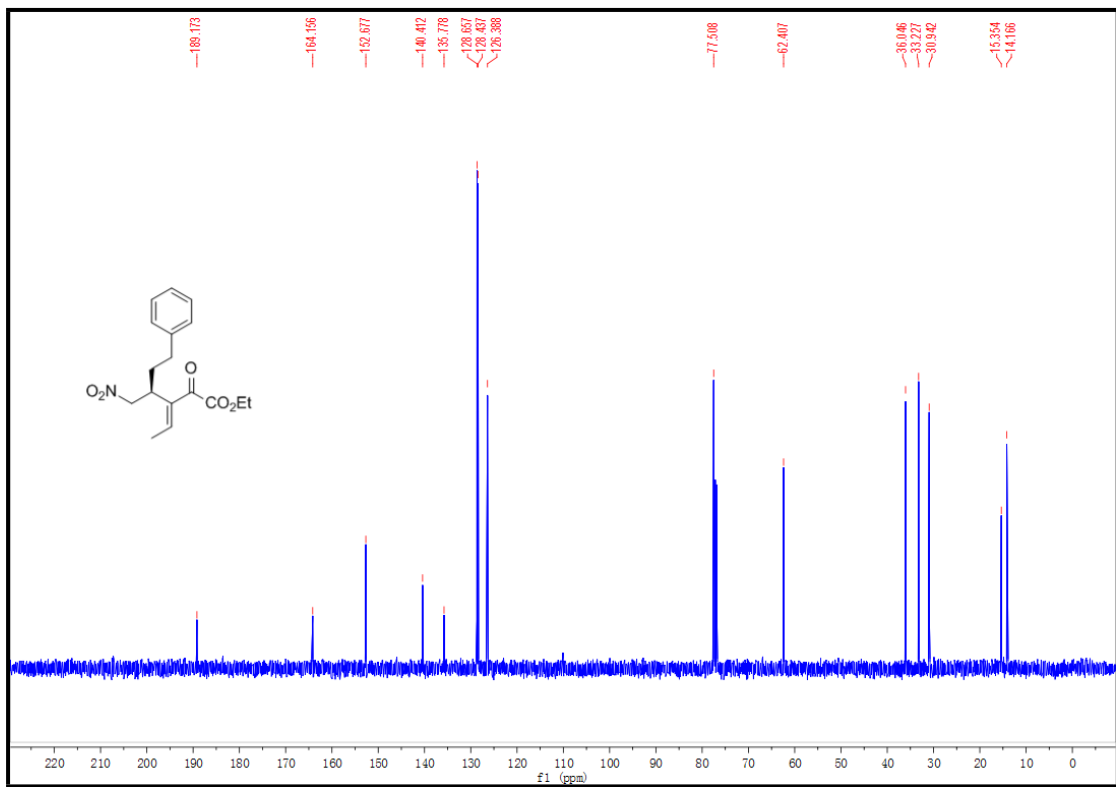

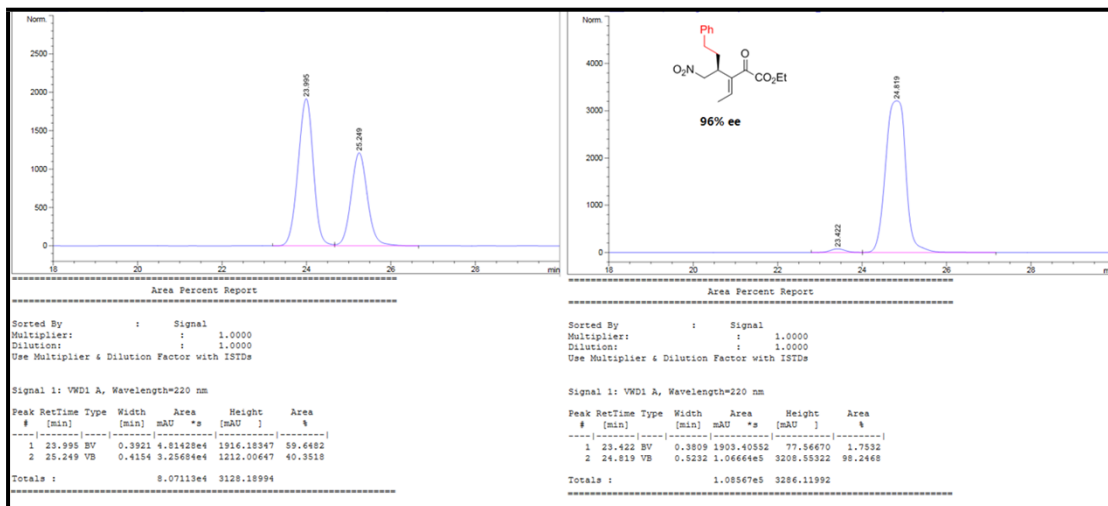

Note: the racemic product was prepared under the catalysis of racemic organocatalyst **F**, which was obtained through the mixture the equal amount of (*S,S*)-**F** and (*R,R*)-**F** isomers.

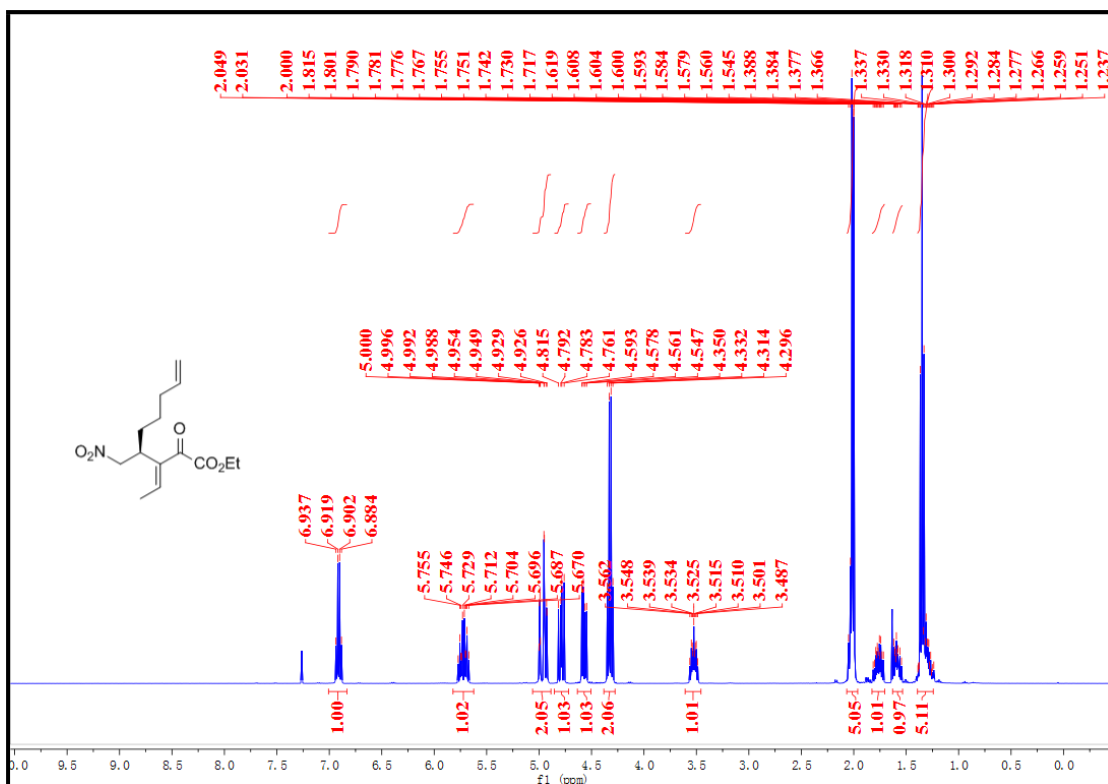

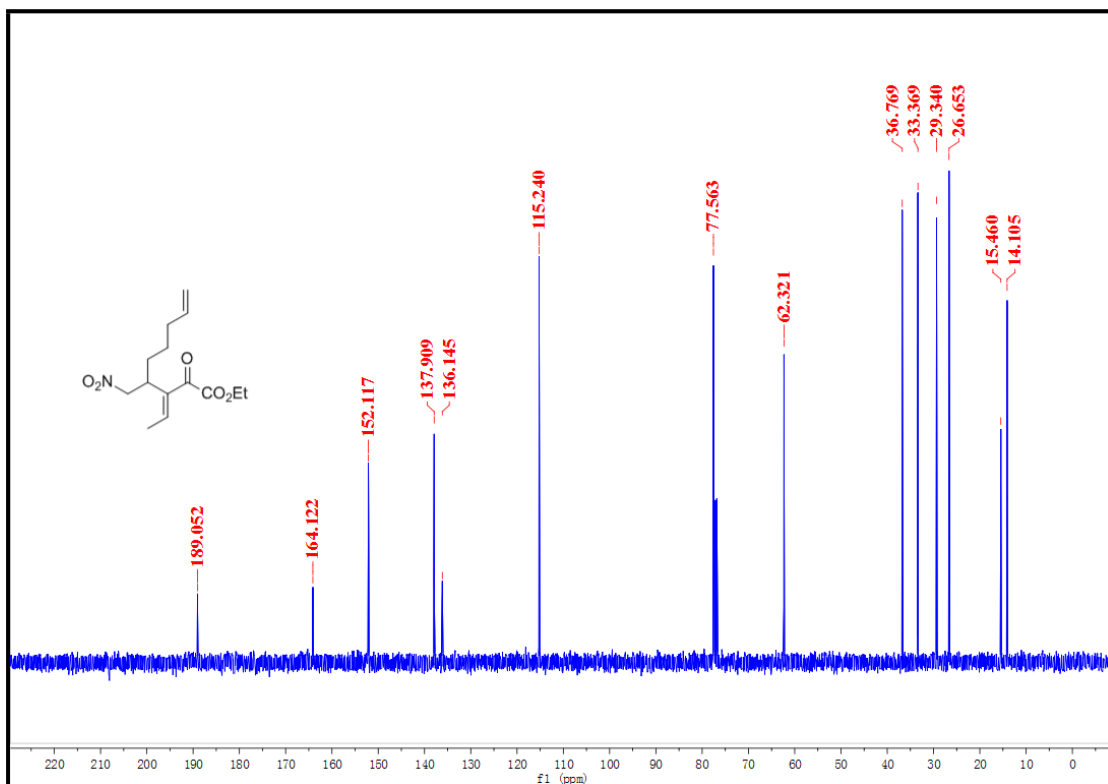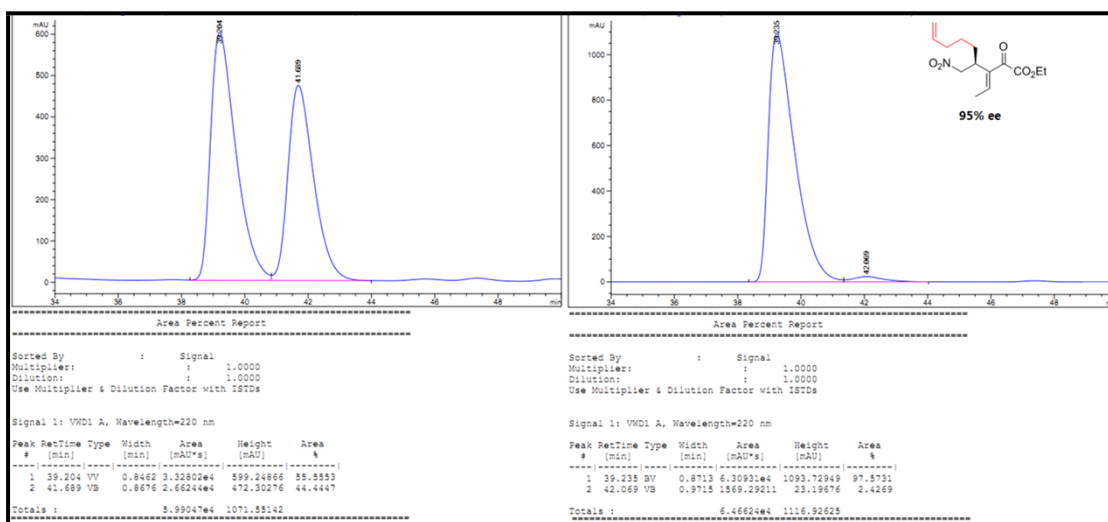

Note: the racemic product was prepared under the catalysis of racemic organocatalyst **F**, which was obtained through the mixture the equal amount of (*S,S*)-**F** and (*R,R*)-**F** isomers.

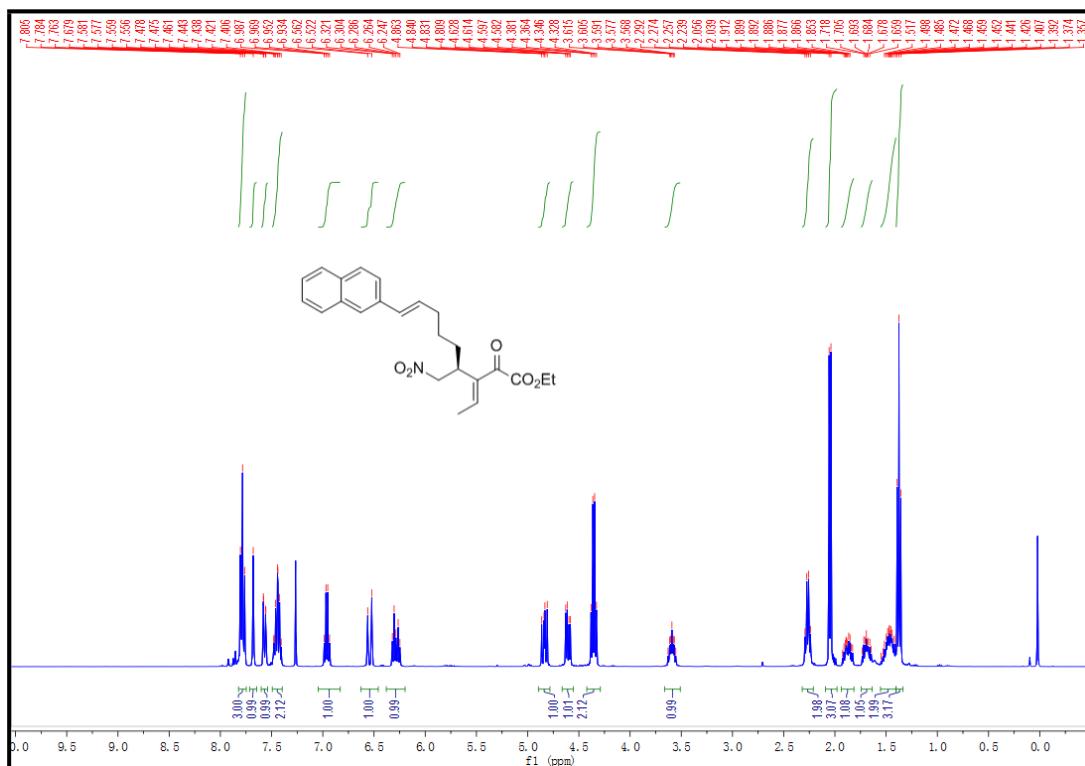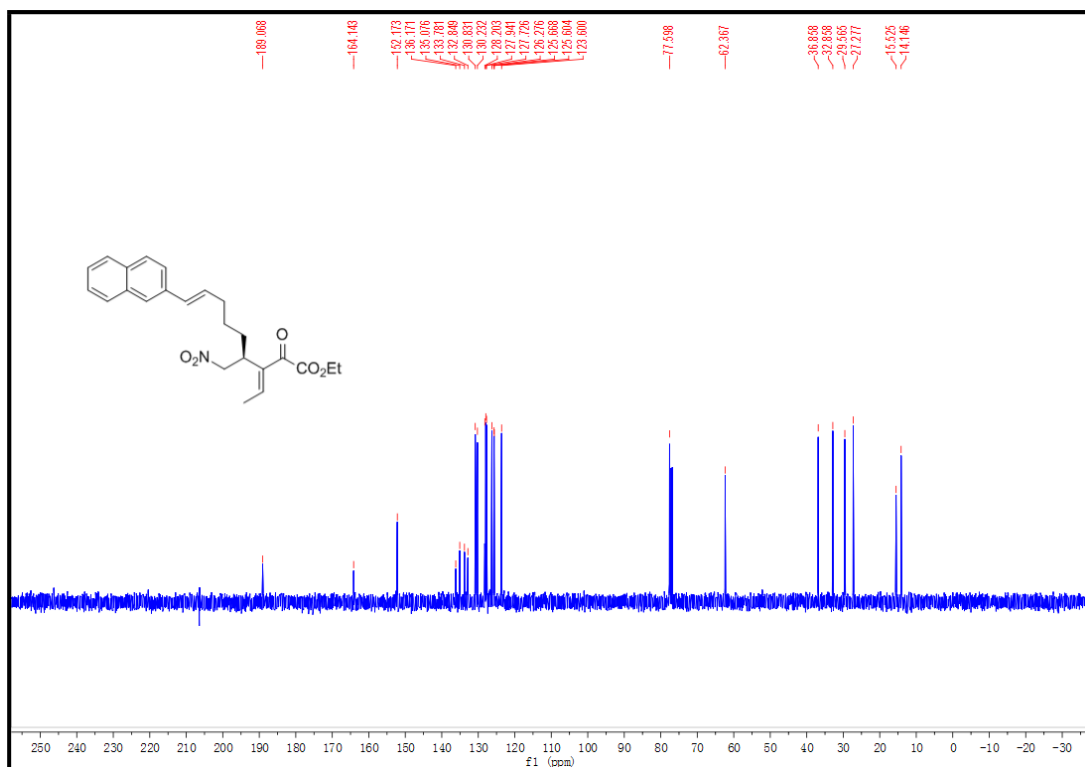



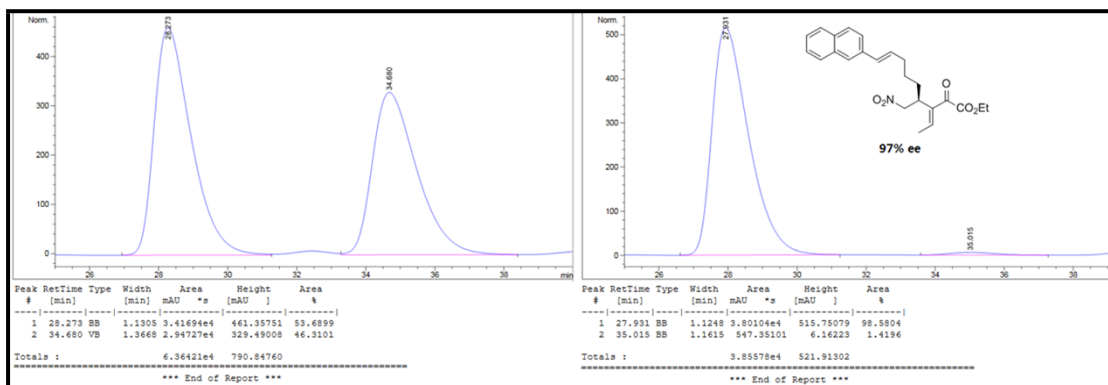

Note: the racemic product was prepared under the catalysis of racemic organocatalyst **F**, which was obtained through the mixture the equal amount of (*S,S*)-**F** and (*R,R*)-**F** isomers.

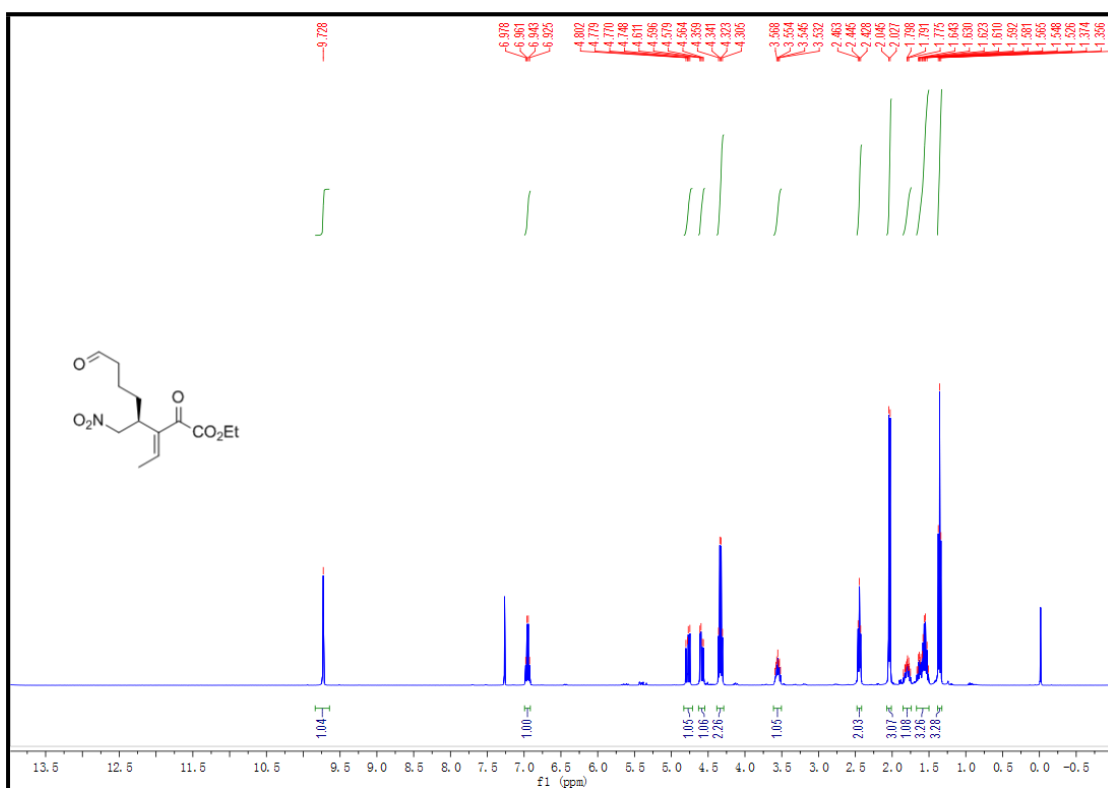

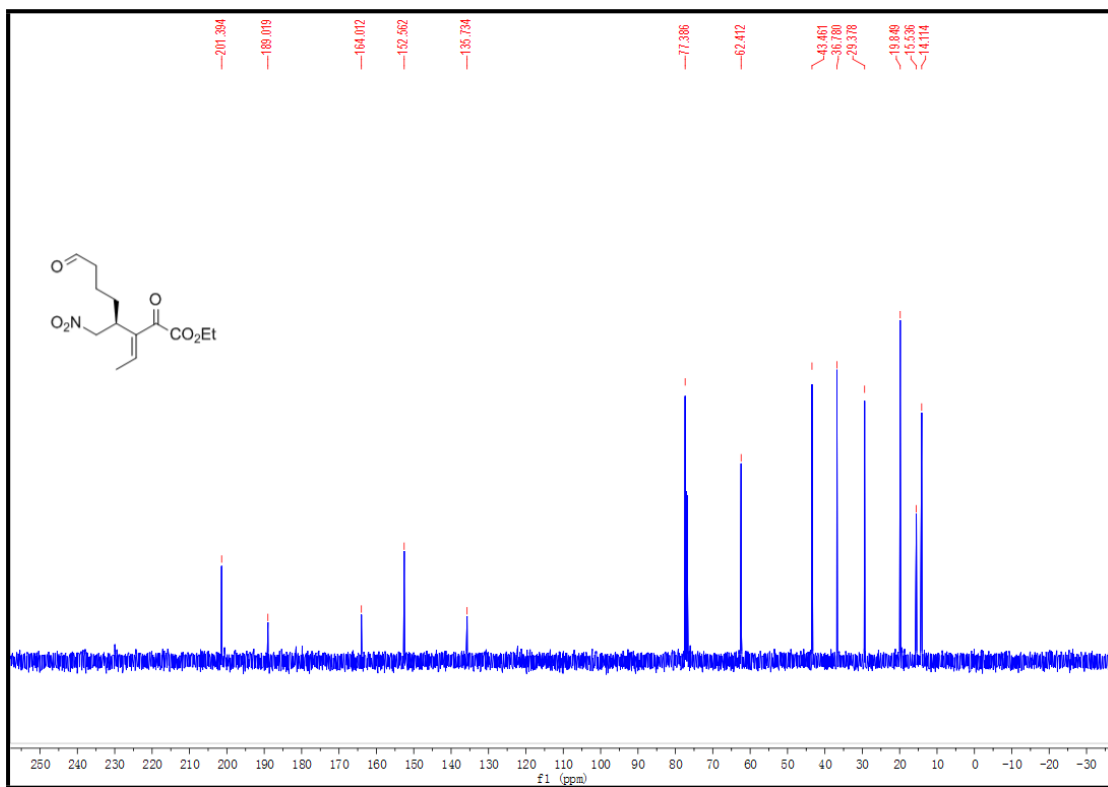

Supplement: d2ra06416b1.pdf [file d2ra06416b1.pdf]
